# Supplementary material for: Assessment of the total precipitable water from a sun-photometer,microwave radiometer and radiosondes at a continental site insoutheastern Europe
Source: Copernicus journal article supplement (doi:10.5194/amt-2018-237), 2018-10-09
Supplement: Supplementary file [file amt-2018-237-AC2-supplement.pdf]

We would like to thank the reviewer for his constructive comments that help us to improve the manuscript. Taking into consideration the comments of both reviewers we have made several modifications in the manuscript and the new paper now includes two new sections (section 2.1 and section 2.5), two new figures (figure 1 and 4) and two new tables (table 4 and 5). In addition three more co-authors have been added in the manuscript: David M. Giles, Mihai Boldeanu and Doina Nicolae. David M. Giles provided important information about the V3 AERONET and reviewed parts of the comparison of the two algorithms and of Cimel with the other instruments. Mihai Boldeanu performed the analysis for the sunshine duration and cloud coverage. Doina Nicolae had not been included in the original submission by mistake, since she is the PI of the AERONET station. We have also added the author contribution section in order to justify the necessity for their inclusion in the paper.

In the following with black are the original comments and with blue our replies.

#### Reviewer #1

This work is a comprehensive comparison of different measurements (Cimel sunphotometer versions 2 and 3, microwave radiometer and radiosondes) of TPW for a single station close to Budapest. It is generally well written, however I strongly recommend the help of a native speaker to improve the language. The article has improved from initial submission, but still I would like to point out some issues that should be address.

1) First of all, the methodology section is still missing, although the authors claimed that they were including it. Maybe there was some problem with the manuscript resubmission. This methodology section should say how are the statistics computed, as well as the matching criteria.

Answer: We have now added the methodology section (section 2.5)

2) Section 2: More information on how the IWV is retrieved from the instrument measurements would be desirable.

Answer: We have enhanced the discussion on the retrieval methods, by adding new paragraphs in section 2.2 (page 4, lines 23-29) and in section 2.3 (page 5, lines 11-15 and 20-29).

3) Page 2, L.26: Actually, as far as I know, sun-photometers only need that the solar disc is free from clouds, but the rest of the sky can be covered by clouds. So the phrase is not really correct.

Answer: We have rephrased now this sentence (and in whole manuscript) and now it is written: "which indicate that at least the solar disc must be free from clouds for TPW retrieval (page 2, line 29)"

4) Page 3, L. 6: Since the models of the radiometer and the sun-photometer is mentioned, the radiosondes model should also appear in this line

Answer: We have added the radiosondes type (Vaisala RS92) (page 3, line 10)

5) Page 4, L. 17-18: authors should explain this "visually inspection". Was it looking at the time-series plot? By comparison with the other instruments?

**Answer:** We have extended the discussion to explain better what we meant by visually inspection and the possible instrumental malfunctions that were identified (page 5, line 20-29). The retrieved Integrated Water Vapor was examined along with the Liquid Water Path, for identification of abnormal values of IWV. An example is given in the figure below. With blue are the original time-series of the IWV, where only the periods with rain have been removed and with red the final, after removing bad quality data.

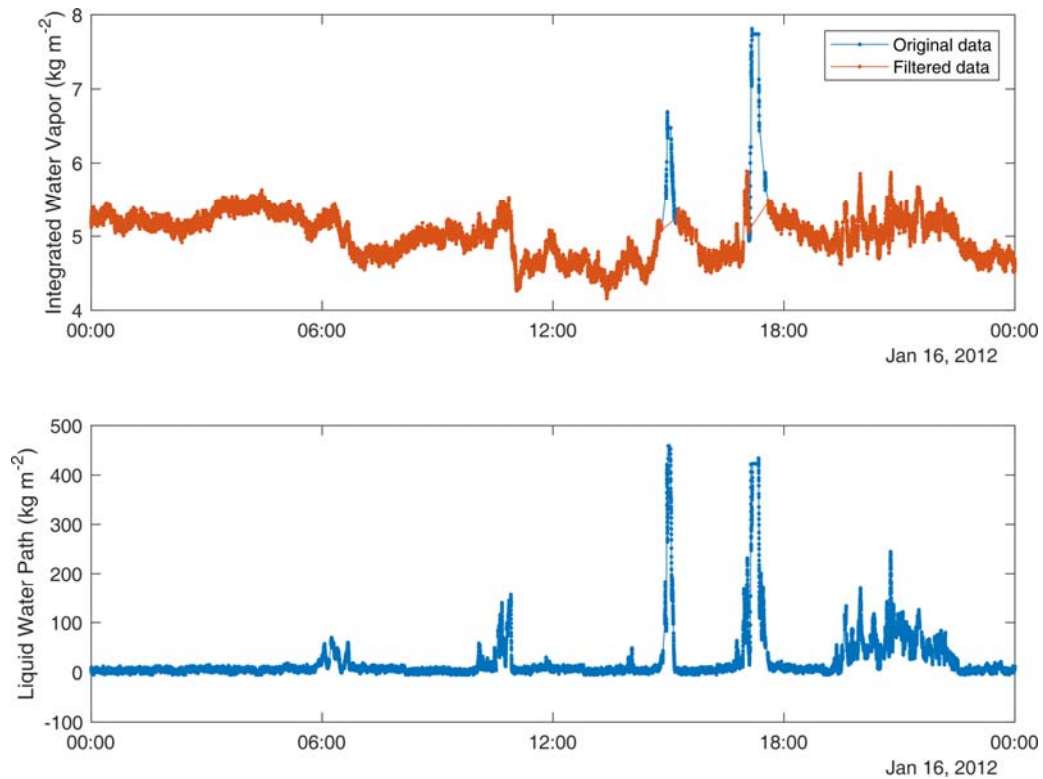

A closer look at about 15:00 o'clock reveals that there are data identified as rain (missing points) and the increase in the IWV is associated with an increased in the LWP, as well. Furthermore, there is a period with no changes in the IWV and LWP levels indicating a possible problem in the data submission. For these reasons it was decided the data between 14:50 and 15:15 to be removed from the final dataset. A similar situation happens between 17:05 and 17:30.

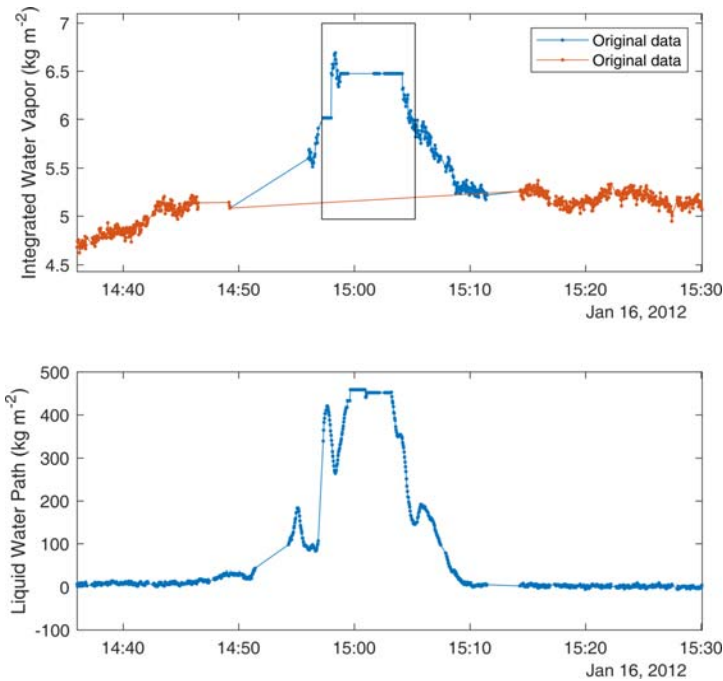

6) Page 6, L. 23: could the authors provide a reference to the dry bias effect?

Answer: We have added reference (Vömel et al., 2007)

7) Page 6, L. 30-31. Why is the dependence almost negligible? Could the authors explain this fact?

Answer: This underestimation is more evident during daytime (i.e.,  $3.12 \pm 9.93\%$  or  $0.35 \pm 1.71$  mm) due to the radiation dry bias effect that affect the radiosondes (e.g., Vömel et al., 2007), which is more pronounced for TPW values less than 10 mm. During nighttime the differences are almost negligible (i.e.,  $-0.50 \pm 9.10\%$  or  $-0.01 \pm 1.57$  mm).

8) Page 7, L. 2: could the authors specify the number of data?

Answer: We have added the number of data: (i.e., just 19 measurements)

9) Page 7, L. 30-31: could the authors provide some reference to this issue?

Answer: In the current version of the manuscript we have included a discussion of this issue in the methodology section (page, lines 18-25).

10) Page 8, L. 28: I do not agree with this sentence, since the Version 3 is supposed to be better quality than Version 2, so the phrase does not make much sense.

Answer: Indeed, V3 is better than V2 but as figure 13a and b shows both versions do not have a pronounced dependence from the SZA.

11) Scatterplot figures (Fig 5a, 10, 12, etc.): authors could provide the confidence interval for the coefficients of regression. Also, p-values cannot be exactly equal to 0, please use the scientific notation to indicate the order of magnitude. Also, indicate if "corr" refers to R or R<sup>2</sup>.

Answer: We have updated the figures to include the 95% confidence intervals for the regression coefficients, deleted p-values and added the square of the correlation coefficient.

12) Histogram of relative differences figures (Fig 10b, 10d, etc): Please, use a statistical test to check if the distribution really follow a normal distribution.

Answer: We have used the Shapiro-Wilk test to check the normality of the data (page 9, lines 25-26, page 11, lines 14-15 and page 11, line 35).

13) Table 2: indicate that these are daily means in the table caption

Answer: We have now updated the table caption

Technical corrections:

1. Page 1, L.17: "IPCC (2013)" should be "(IPCC, 2013)"

Answer: Done

2. Page 2, L. 5: Citation is incorrect.

Answer: We have corrected it

3. Page 2, L.19: TWP instead of TPW.

Answer: Corrected

4. Page 2, L.22: it should be AErosol RObotic NETwork (AERONET).

Answer: Done

5. Page 5, L.13: I understand PC means Personal Computer, but as an acronym it should be indicated.

Answer: Done

6. Page 8, L. 13: maybe the authors mean "do not allow"

Answer: The reviewer is right; we would like to thank him for pointing this out

# Assessment of the total precipitable water from a sun-photometer, microwave radiometer and radiosondes at a continental site in southeastern Europe

Konstantinos Fragkos<sup>1</sup>, Bogdan Antonescu<sup>1</sup>, David M. Giles<sup>2,3</sup>, Dragoş Ene<sup>1</sup>, Mihai Boldeanu<sup>1</sup>, Georgios A. Efstathiou<sup>4</sup>, Livio Belegante<sup>1</sup>, and Doina Nicolae<sup>1</sup>

<sup>1</sup>National Institute of R&D for Optoelectronics INOE 2000, 409 Atomistilor Str., Măgurele, Ilfov, Romania

<sup>2</sup>Science Systems and Applications Inc. (SSAI), Lanham, MD 20706, USA

<sup>3</sup>NASA Goddard Space Flight Center (GSFC), Greenbelt, MD 20771, USA

<sup>4</sup>Department of Mathematics, Centre for Geophysical and Astrophysical Fluid Dynamics, University of Exeter, Exeter, UK

**Correspondence:** Konstantinos Fragkos (kostas.fragkos@inoe.ro)

**Abstract.** In this study, we discuss the differences in the total precipitable water (TPW), retrieved from a Cimel sunphotometer operating at a continental site in South-East Europe, between the Version 3 (V3) and Version 2 (V2) of the Aerosol Robotic Network (AERONET) algorithms. In addition, we evaluate the performance of the two algorithms comparing their product with the TPW obtained from a collocated microwave radiometer and nearby radiosondes during the period 2007–2017. The TPW from all three instruments was highly correlated, showing the same annual cycle, with lower values during winter and higher during summer. The Sun-photometer and the microwave radiometer ~~depicts~~depict the same daily cycle, with some discrepancies during early morning and late afternoon due to the effect of solar zenith angle on the measurements of the photometer. The TPW from the ~~(V3)~~ of the AERONET algorithm has small differences compared with ~~(V2)~~, mostly related to the use of the new laboratory-based temperature coefficients used in V3. The microwave radiometer ~~shows very good performance~~compared to the radiosondes measurements are in good agreement with those obtained by the radiosonde, especially during nighttime when the differences between the two instruments are almost negligible. The comparison of the sun-photometer data with high-quality independent measurements from radiosondes and radiometer shows that the absolute differences between V3 and the other two datasets are slightly higher compared with V2. However, V3 has a lower dependence from the TPW and the internal sensor temperature, indicating a better performance of the retrieving algorithm. The calculated one sigma uncertainty for V3 as estimated, from the comparison with the radiosondes, is about 10%, which is in accordance with previous studies for the estimation of uncertainty for V2. This uncertainty is further reduced to about 6% when the AERONET V3 is compared with the collocated microwave radiometer. To our knowledge, this is the first in-depth analysis of the V3 TPW and although the findings presented here are for a specific site, we believe that they are representative of other mid-latitude continental stations.

## 1 Introduction

Water vapor is a crucial atmospheric component of Earth's climate, since it is the most abundant greenhouse gas ~~IPCC (2013)~~(IPCC, 2013). Water vapor plays a prominent role in the hydrological cycle through water evaporation and condensation while

providing the energy to drive moist convection and resulting precipitation. The large-scale flow and local circulations contribute to the large variability of the spatial and temporal distribution of water vapor. For weather forecasting, precipitation efficiency is strongly related to the water vapor content which in turn determines the potential stability of the atmospheric column. Thus, accurate estimations of water vapor content are essential for meteorological and climate applications such as radiative transfer modeling (e.g., Paynter and Ramaswamy, 2012) or weather forecasting (e.g., Liang et al., 2015).

A common measure of the water vapor content in the atmosphere is the total precipitable water (TPW), defined as the total water “contained in a column of unit cross section extending all ~~of~~ the way from the earth’s surface to the top of the atmosphere” (American Meteorological Society, 2018). Initially, radiosonde measurements ~~have been~~ were used to measure TPW (e.g., Reber and Swope, 1972). Although, the radiosonde measurements are reliable they are limited, for example, by freezing of moisture sensors which lead to errors in the estimation of moisture, or by the phase lag between the dry and wet bulb sensors (Campmany et al., 2010). In addition, the global radiosonde network coverage is limited (e.g., McCarthy, 2008). Thus, considering the large variability of water vapor both in time and space, it becomes obvious that soundings provide a very limited spatiotemporal representation of TPW (Liang et al., 2015).

To overcome these issues, a number of methods for TPW estimation based on active or passive remote sensing techniques, either from the ground or the space, have been developed. From the ground the most common ones include the GPS system (Mears et al., 2015), microwave radiometers (Westwater and Guiraud, 1980), Cimel sunphotometers (Halthore et al., 1997; Holben et al., 1998), FTIR (Sussmann et al., 2009) and Raman lidars (Ferrare et al., 1995; Filioglou et al., 2017). Recently, techniques have been developed for the retrieval of TPW from measurements of the precision solar spectroradiometer at World Radiation Center (WRC) Davos (Raptis et al., 2018), the PESR/PREDE-POM sun-sky radiometers (Campanelli et al., 2018) and from Max-DOAS observations (Wagner et al., 2013).

The quality of the retrieved TPW from each instrument is assessed through comparison with other independent measurements. In general, radiosondes and the global GPS systems have been used for the evaluation of ~~TWP measurement~~ TPW measurements from satellite data (Van Malderen et al., 2014; Román et al., 2015; Vaquero-Martínez et al., 2017; Vaquero-Martínez et al., 2017; Gui et al., 2017; Vaquero-Martínez et al., 2018). Of particular interest is the evaluation of the TPW from Cimel sun photometers which are part of ~~AERONET~~ (AERosol RObotic NETwork) (AERONET), a network with global coverage. Several studies have validated the TPW retrieval from Cimel sun-photometers with radiosondes, GPS, and microwave radiometer measurements (~~Sapucci et al., 2007; Schneider et al., 2010; Campmany et al., 2010; Pérez-Ramírez et al., 2014; Van Malderen et al., 2014; Gui et al., 2017~~ Sapucci et al., 2007; Schneider et al., 2010; Campmany et al., 2010; Pérez-Ramírez et al., 2014; Van Malderen et al., 2014; Gui et al., 2017). Although their dense network, Cimel sun-photometers have a series of limitations because they require sun light ~~and clear sky conditions~~, which indicate that at least the solar disc must be free from clouds for TPW retrieval. These conditions restrict the availability of data just during daytime and thus reduce the temporal availability of the datasets. Nevertheless, Pérez-Ramírez et al. (2014) demonstrated that Cimel can provide extended time series with good temporal resolution. Lunar photometer could provide TPW during nighttime (e.g., Barreto et al., 2013), but this product is not yet available in the AERONET database.

In this article, we focus on measurements conducted at the Romanian Atmospheric 3D Observatory (RADO). The reason for this is that RADO is the only site, to our knowledge, in South-Eastern Europe that has long-term measurements of TPW from

three independent instruments (i.e., Cimel sun-photometer, microwave radiometer, radiosondes). Therefore, it can be used as a testbed to assess the quality of the measurements, especially because the radiometer provides continuous, high-quality observations of TPW. Furthermore, this site is one of the few potential sites from South-Eastern Europe that can be used for satellite cal/val activities. Thus, the evaluation of the RADO measurements is an essential process towards this goal.

5 Recently the newly released version 3 of the AERONET products has become publicly available. This new version incorporates significant improvements for the direct sun measurements, such as a new improved cloud screening algorithm, automated quality check procedures, inclusion of higher airmass data, and new temperature characterization and corrections to all channels (Giles et al., 2016) (Giles et al., 2019). To our knowledge, no study has evaluated the newly released version of the TPW from the AERONET, so far. In this study, the quality of the TPW measured by three different instruments (i.e., HATPRO-G2  
10 microwave radiometer, a Cimel sun-photometer and [Vaisala RS92](#) radiosondes) at a site in southeastern Europe is assessed. The paper is organized as follows. The instruments used in this study are described in section 2. In section 3, the climatology of the annual cycle of TPW observed over the studies area, and the comparison of the different dataset employed for the measurements of TPW are presented. More specifically the differences between the microwave radiometer and radiosondes, Cimel V2 and V3 and the radiosondes, Cimel V2 and V3 and the radiometer are analyzed and the factors affecting their agreement  
15 are assessed. Section 4 summarizes this article.

## 2 Data and ~~Site description~~ [Methodology](#)

### 2.1 [Meteorological parameters](#)

The HATPRO-G2 microwave radiometer and the Cimel sun-photometer used in this study were located at the Romanian Atmospheric 3D Observatory (RADO, 44.82°N, 26.82°E, 93m ASL) part of the National Institute of Research and Development  
20 for Optoelectronics (INOE2000). The observatory is located in the city of Măgurele, Ilfov, at the central part of the Romanian plain, approximately 10 km southwest of Bucharest, the capital city of Romania, and is surrounded by research facilities, residence buildings and a small forest. Central Romanian plain has a temperate climate influenced by the western circulation, the east-European anticyclone, the Mediterranean cyclones, and the tropical advections (Cheval et al., 2009). [The relative humidity at Magurele, as calculated from observations from the RADO weather station between 2007–2016, has high values \(>80%\) during November - February and low \(<60%\) between May - September \(Fig. 1\). Since Cimel sun-photometer perform measurements only when the solar disk is free of clouds, two critical parameters for the availability of the Cimel data are the sunshine duration and the cloud fraction. For the calculation of the climatology of the sunshine duration the Surface Radiation Data Set - Heliosat \(SARAH\) - Edition 2 \(Pfeifroth et al., 2017\) of the EUMETSAT's Satellite Application Facility on Climate Monitoring \(CM SAF\) was used. The Sunshine duration \(SDU\) product is the daily sunshine duration per day at which Direct Normal Irradiance \(DNI\) exceeds the WMO threshold of 120 W/m<sup>2</sup>. SDU is derived by the ratio of sunny slots to all slots during daylight multiplied by the daylength. The daylength is calculated depending on the date, longitude and latitude. The daylength is restricted by a threshold of the solar elevation angle \(SEA\) of 2.5°. The SDU product is provided on a regular latitude/longitude grid with a spatial resolution of 0.05° x 0.05°. In this study, for the calculation of the climatological sunshine](#)  
30

duration, the daily SDU at the closest pixel over Magurele during the period 2005–2015 was used. A full description of the SDU product can be found at Kothe et al. (2017). For the calculation of the cloud fraction climatology the CM SAF Cloud property dAtAset Using SEVIRI - Edition 2 (CLAAS-2, Finkensieper et al. (2016)) was used. The cloud fractional cover (CFC) is defined as the fraction of cloudy pixels per grid cell compared to the total number of analyzed pixels in the grid cell and is expressed in percentage. In this study the daytime CFC during the period 2005–2015 was used. The daily CFC product is provided on a regular latitude/longitude grid with a spatial resolution of  $0.05^\circ \times 0.05^\circ$ . A full description and evaluation of the CFC product is given in Benas et al. (2017). High cloud coverage ( $>70\%$ ) affect the RADO site from November to February (Fig. 1), while the lowest cloud fraction ( $<40\%$ ) is during July - August. The rest of the months the cloud fraction ranges between 50 and 60%. The high percentage of clouds, in combination with the small sunshine duration (Fig. 1), during late autumn and winter affect the availability of the Cimel data during these months. Thus calculations of multi-year annual mean TPW values from Cimel observation are biased from the highest number of data points during summer. The sunshine duration exhibits a clearly annual cycle with minimum during winter and maximum during summer and ranges from  $\sim 2.3$  hours during January (minimum) to up to more than 10 hours during July (maximum) (Fig. 1).

## 2.2 Cimel Sun-Photometer

A Cimel Electronique 318A sunphotometer (serial number #359) was installed at the RADO facilities in July 2007 and was operated until May 2016, when it was reallocated to Poland. As a replacement a Cimel lunar photometer operates since 2016, but data from this instrument have not been used in this study due to the limited availability of level 2 data. Cimel is the standard instrument of the AERONET (Holben et al., 1998) used to-for the study of the aerosol total column load. It performs spectral measurements of the direct sun irradiance and sky radiance at six discrete wavelengths using interference filters. The filters are centered at the wavelengths of 340, 380, 440, 500, 675, 870, and 1020 nm. An additional channel at 940-935 nm is used for the retrieval of the TPW. The instrument is calibrated almost annually following the procedures and the guidelines of the AERONET. TPW is calculated based on a modified expression of the Beer-Bouguer-Lambert Law. ~~Details about the algorithm can be found in Smirnov et al. (2004) and Schmid et al. (1996).~~ Since Giles et al. (2019) provide a full description of the TPW retrieval algorithm (see Section 2 of that paper), in this section just the major differences between V2 and V3 and some other factors that may influence the TPW retrieval are discussed. For the computation of TPW a necessary preliminary step is the subtraction of the AOD and Rayleigh optical depths from the total optical depth at 935 nm. Since AOD is not calculated direct for the 935 nm channel due to the strong effect of water vapor, the AOD at 870 nm is extrapolated at the 935 nm using the Ångström Exponent (AE) at 440-870 nm. The main differences in the computation of TPW in V3 are that the new algorithm accounts for updated continuum look-up table (Mlawer et al., 2012), using Total Internal Partition Sums (Gamache et al., 2017) and using the extraterrestrial spectral solar irradiance from Coddington et al. (2016). In this study all available data from July 2007 to May 2016, level 2 from the Versions 2 and 3 of AERONET algorithms, were used. Level 2 data are screened for clouds and quality controlled. ~~In addition, the calibration constant of the instrument between two periods has been evaluated.~~ quality controlled and pre-field and post-field calibration applied. The newest released Version 3 incorporates improvements for the direct sun measurements 1) related to the screening of clouds, 2) the automated data quality assurance,



3) inclusion of data with higher airmasses (i.e., from 1 to 7, in contrast with V2 that ranges from 1 to 5), 4) implementation of spectral temperature corrections based on laboratory measurements (i.e., unlike Version 2 that was based on the manufacture specifications) ~~(Giles et al., 2016). Pérez-Ramírez et al. (2014) evaluated the TPW. Details about all the improvements implemented in the V3 of AERONET can be found at Giles et al. (2019). The AERONET TPW measurement uncertainty is estimated to be <10% (Halthore et al., 1997; Holben et al., 2001), which is consistent with the one sigma uncertainty for AERONET V2 provided by Pérez-Ramírez et al. (2014) of 7%-9% after evaluating the TPW from AERONET at the U.S. Department of Energy Atmospheric Radiation Measurement Program (ARM) sites against microwave radiometers, GPS, and radiosondes, and concluded that Cimel has a maximum overall uncertainty of less than 15%.~~

## 2.3 Microwave radiometer

10 The HATPRO-G2 microwave radiometer used in this study was produced by Radiometer Physics GmbH. It is a passive instrument working in the microwaves regime. It consists of two working bands 22–31 GHz and 51–58 GHz, each with 7 channels. The relevant receiving optics, the ambient load, the internal scanning mechanism, the electronics and the data acquisition system of the radiometer are described in Rose et al. (2005). For humidity profiling only the first band is used. The vertical resolution for profiling is variable, ranging from 200 meters bellow 2000 m to 800 m for altitudes higher than 5000 m. ~~In this study,~~

15 ~~the~~ Water vapor emission dominates the signal in the 23.8-GHz channel, which is on the wing of the 22.2-GHz water vapor absorption line, whereas liquid water emission constitutes the primary portion of the signal at 31.4 GHz (Turner et al., 2007). From these two observations, both integrated water vapor (IWV) and Liquid Water Path (LWP) can be retrieved. The retrievals are performed in the zenith direction. In this study, the IWV was used, which presents, according to the manufacturer<sup>1</sup>, an accuracy of  $\pm 0.2 \text{ kg m}^{-2}$  RMS and noise of  $0.05 \text{ kg m}^{-2}$ . Considering the density of liquid water, the IWV expressed in  $\text{kg m}^{-2}$

20 is equivalent with the TPW expressed in mm of liquid water (Bevis et al., 1992). In this study measurements are performed each 2 seconds. To ensure the high quality of measurements, the instrument is absolutely calibrated with liquid nitrogen every 6 months following the instructions of the manufacturer. All the available data between 16 December 2009 and 31 December 2017 were used. Data ~~The internal data quality has three options for filtering level 2 data (retrieved atmospheric data). The Flag Data Quality (Level 2) option does not filter the level 2 data according to the quality level but flags each data sample in the rain~~

25 ~~flag byte. With the option Remove Medium / Low Q., medium and low quality samples are not transmitted by the radiometer. In this case, the sample sent to the personal computer that controls the instrument is the repeated latest high quality sample. The filter Remove Low Quality only removes the worst quality level data and transmits high and medium quality data. In the~~ presence study, the first option was used for the creation of the Level 2 data, thus only data which have been flagged as rain from the internal sensor of the instrument have been removed. In addition, ~~the all days with~~

30 ~~to remove all the points associated with instrument malfunction that were not captured by the internal quality control of the instrument~~ for identification of instrumental malfunctions, which can include periods where there are no changes in the TPW

<sup>1</sup>RPG-HATPRO-G4 series Microwave radiometers for continuous atmospheric profiling, access from [https://www.radiometer-physics.de/download/PDF/Radiometers/HATPRO/RPG\\_MWR\\_PRO\\_TN.pdf](https://www.radiometer-physics.de/download/PDF/Radiometers/HATPRO/RPG_MWR_PRO_TN.pdf) on 13 July 2018.

values due to bad transmission of data or periods with low quality data (i.e., when the TPW was remaining high after rain, until to return in their previous levels after some time).

## 2.4 Radiosondes

The radiosonde measurements were obtained from the sounding database maintained by the University of Wyoming<sup>2</sup>. Between July 2007 and December 2017, 3760 radiosonde measurements for 0000 UTC and 3759 for 1200 UTC were available from the Bucharest site, situated at approximately 30 km northeast from the RADO facility, and operated by the Romanian National Meteorological Administration. The radiosondes used during the study period were Vaisala RS92 type. For this type of radiosondes, Miloshevich et al. (2009) showed that the accuracy of the humidity sensor during daytime depends on the calibration error and the dry bias due to the solar heating effect (Turner et al., 2003) and during the nighttime just from the calibration error. The overall uncertainty of TPW from radiosonde measurements have been estimated to  $\pm 5\%$  (Pérez-Ramírez et al., 2014). TPW over the entire sounding was calculated as

$$TPW = \frac{1}{\rho g} \int_{p_1}^{p_2} x dp \quad (1)$$

where  $x(p)$  is the mixing-ratio-water vapor mixing ratio at the pressure level  $p$ ,  $\rho$  is the density of water and  $g$  is the acceleration of gravity.

## 3 Results

### 2.1 ~~Climatology of total precipitable water in Măgurele~~Methodology

For the computation of the daily mean values of TPW all available measurements that qualify the quality criteria were used. A preliminary step was the averaging of TPW from the MWV radiometer into 1-minute intervals. Table 1 gives an overview of the total number of observations~~that have been analyzed~~, along with their total number of corresponding days ~~that have~~ been analyzed for each instrument and for the different versions of the AERONET algorithms in order to compute the daily averages. Due to the different schedule of each instrument and the gaps in each database the computed averages cannot be direct compared between them. For a direct comparison we extracted the common measurements between V2 and V3 and they were averaged for  $\pm 20$  min around the launch time of the noon radiosonde. The same averaging was applied to the MWR data, so as to extract a data-set of simultaneous or nearly simultaneous measurements from all instruments. Since the exact hour of the radiosonde launch is not explicitly known, this 40 minutes interval has been selected in order to ensure that the instruments detect the same air-masses and to limit the atmospheric variability which takes place on time scales larger than 1 h (Schneider et al., 2010). If the GPS information of the radiosondes are available, a further improvement in the coincidence criteria would be to average the Cimel data for  $\pm 20$  min since the time the balloon reaches the altitude of the 4 km, following

<sup>2</sup> <http://weather.uwyo.edu/upperair/sounding.html>, access on 13 July 2018.

Schneider et al. (2010). However, in our case the access to the raw data is not available, thus the averaging was performed  $\pm 20$  min around the launch time. For the comparison of the MWV radiometer and Cimel data with the radiosondes the same coincidence criteria as described above was used. The comparison of the two different algorithms of AERONET is based just on their common measurements. This way the comparison provides insight into the TPW calculation differences between the two algorithm versions, rather than impacts due to cloud screening and instrument quality controls. For the comparison of the Cimel data with the MWV radiometer the exact time matched measurements were selected. For the evaluation of the MWV radiometer and Cimel data, the radiosondes TPW was used as the reference measurements, because there are considered more representative of the actual atmospheric conditions. However, since the radiosondes site is in a distance of  $\sim 30$  km from the RADO facilities, there is the possibility the different instruments to detect airmasses with different characteristics, especially when the radiosondes are affected from southwest winds. Thus, the calculated uncertainty expressed as the  $1\sigma$  of the mean difference between the different datasets is expected to be little overestimated when compared to the radiosondes. The absolute and relative differences between two sets of measurements were defined as

$$X - X_{ref} \quad (2)$$

and

$$100 \cdot \frac{(X - X_{ref})}{X_{ref}} \quad (3)$$

respectively, where ( $X_{ref}$ ) is the reference measurement (i.e., the radiosonde measurement, except for the comparison between Cimel and the microwave radiometer).

### 3 Results

#### 3.1 Climatology of total precipitable water in Măgurele

The times series of the daily mean values for the TPW from the different instruments employed in this study are shown in Fig. 42. In general, the radiosonde measurements are available twice per day (i.e., 0000 and 1200 UTC). The Cimel measurements are restricted only during day time and under ~~clear-sky-conditions~~ conditions that require the solar disc to be clear of clouds, while the microwave radiometer performs measurements during day and night time under all weather conditions. Although there are differences in the measurements schedule, all three instruments depict the same annual cycle, demonstrating their capability of performing long-term measurements for climatological applications (Fig. 42). The gaps in ~~the radiometer time-series are due to instrumental-related issues and the ones in~~ Cimel time series are due to the calibration of the instrument which requires the reallocation of the instrument. Data gaps of the microwave radiometer are due to malfunction of the instrument or controlling PC ~~Personal Computer~~ (usually solved with a restart after a maximum of couple of days), or due to the relocation of the instrument during different measurement campaigns (data not included in this study). Furthermore, in the beginning of 2016 the instrument was sent to the manufacturer for testing and replacing several components.

The observed differences in the mean values calculated from all instruments (Table 2), ~~are mostly due~~ can be mostly attributed to the different operating period of each instrument and their different sampling rate. ~~The~~ However, even though the overall mean from Cimel measurements is not significantly different from the radiosondes and the microwave radiometer estimates, Cimel measurements are actually biased towards the higher TWP values observed during the summer. Since the cloud fraction during the winter months at Magurele is pretty high, more than 70% from November to January (Fig. 1) when also TPW attains its minimum values (Fig. 2), the number of Cimel observations is substantially reduced leading to the inclusion of a reduced number of low TWP days in the Cimel dataset. This observed summer (wet) bias is partly compensated by the inherent Cimel dry bias (e.g., Schneider et al., 2010) due to restrictions of measurements when the solar disc is cloud free and thus the overall TWP mean from Cimel is similar to the other methods (Table 2). This dry bias for the mid-latitudes is more pronounced during during winter and can range from 25 to 50%, while at summer is between 5 to 25% (Gaffen and Elliott, 1993). The clear sky monthly bias can be clearly seen in the mean monthly values of TPW (Table 3), where the Cimel measurements during January can be lower  $\sim 25\%$  compared to the radiosondes, while the summer mean monthly values are lower by only few percent (e.g.  $\sim 4\%$  for August) (Fig. 4a). Such a behavior is not observed for the MWV radiometer with the differences on their mean monthly values to range with  $\pm 10\%$  for all months (Fig. 4b). The minimum daily values can be as low as 2 mm, while the maximum exceed 44 mm (Table 2). The peak-to-peak range during the year (i.e., from minimum to maximum) can be up to 20 mm.

The annual cycle of the TPW as depicted by all three instruments, has minimum during winter months (DJF) and a maximum during summer months (JJA) (Fig. 23). Higher air temperature during the summer implies a larger capacity to store water vapor without saturation (Campmany et al., 2010). The small differences on the monthly median values for all ~~instruments~~ ~~-instruments~~ are due to their different sampling rates. For example, the increased number of outliers in the radiosondes boxplots, compared to the other instruments, can be attributed to the limited number of measurements (i.e., a maximum of two per day). Thus, some high/low values are not smoothed by averaging all measurements during the day (Fig. 23a). In any case, the main aim of the analysis presented here is to show that the annual cycle of TPW can be depicted fairly well by all instruments and demonstrate their capabilities for long-term monitoring for climatological applications. A direct comparison of the daily values from each instrument ~~would not be~~ ~~is not~~ valid due to the very different sampling rates and the diurnal variation of TPW as shown in Fig. 35. An overview of the statistical values based on all available measurements for all three instruments is shown in Table 3. For a direct comparison of the different measurements, the data-set that was created utilizing just the nearly-common measurements as described in Section 2.4 was used. This data-set consists from a total of 234 days during the measurements period, which is limited by the Cimel observations during conditions where the solar disc was free of clouds. For this reason, the comparison of the different instruments is not affected by the clear sky dry bias. An overview of the long-term averages of the common measurements from all instruments can be seen in Table 4. The MWV radiometer has the higher mean TPW (18.57 mm), followed by the radiosondes (17.96 mm), CV2 (17.80) and finally CV3 (17.65). Although this dataset, consists of nearly time-matched measurements, the small differences on the long-term averages may occur from differences in the geometry of the measurements and subsequently the sounding of airmasses with different characteristics. For example, the Cimel sun-photometer measures the direct sunlight and can track the Sun between clouds, while the MWR the

zenith sky radiance and it may not be completely cloud free while for the same sky. The radiosondes are also launched from a different area, which could possibly track different air-masses. The mean monthly TPW values (Table 5) appear to have very good agreement (within  $\pm 5\%$ ) among the different instruments when using common data periods (Fig. 4b). The Cimel clear sky dry bias that had been observed, especially during the winter months in the long-term averages when computed from all measurements (Table 3) has been canceled out, as can be clearly seen in Fig. 4b.

### 3.2 Sensitivity of the instruments to diurnal variation

As mentioned previously, the temporal resolution of the microwave radiometer is on order of few seconds in combination with its capacity to operate under all weather conditions allow the detection of the TWP diurnal variations. In addition, under clear sky conditions, the Cimel sun-photometer perform measurements at about every 20-15 min. To verify if both instruments depict the same daily cycle, the diurnal variability for six randomly-selected days was examined. The days were selected under the condition that the number of Cimel observations was enough so as the daily cycle can be captured, indicating that there were clear or near-clear sky conditions. Cimel measurements cover the biggest part of the day, and especially the high SZAs ( $>70^\circ$ ) no discontinuation due to clouds in Cimel measurements was observed from sunrise to sunset and cover all seasons. Cimel and the microwave-MWV radiometer depict the same diurnal variation during daytime (Fig. 35), with some small differences in their absolute values which are further investigated in the following sections. For some of the selected days (i.e., 08 June 2012, 26 October 2013) there are differences in the diurnal variation during the early morning or late afternoon hours, which are most likely artifacts associated with direct sun measurements at high aimasses (e.g.  $SZA > 70^\circ$ ). These artifacts are due to Cimel clock deviations which results in some minor deviation in the optical airmass calculation and thus slightly impacts AOD but within uncertainty expectations (see section 3.3.1 of Giles et al. (2019)).

### 3.3 Comparison between radiosondes and microwave radiometer

To account for spatial and temporal differences between the radiosonde and the microwave radiometer, all the microwave radiometer data were averaged over an interval of 20-40 min centered on the radiosonde launching time. A total number of 2789-2820 common measurements, out of which 1400-1416 during daytime (i.e., at 1200 UTC) and 1389 during night-1404 during nighttime (i.e., at 0000 UTC) were extracted for the comparison. The absolute and relative differences between two sets of measurements were defined as-

$$\frac{X - X_{ref}}{X_{ref}}$$

and

$$100 \cdot \frac{(X - X_{ref})}{X_{ref}}$$

respectively, where ( $X_{ref}$ ) is the reference measurement (i.e., the radiosonde measurement, except for the comparison between Cimel and the microwave radiometer).

The ~~relative~~ difference between the two datasets is in general between  $\pm 25\%$  (Fig. 46). The ~~radiosondes slightly underestimate~~ MWR ~~slightly overestimates~~ TPW with the overall difference from the ~~microwave radiometer to be 1.80~~ ~~radiosondes to be 1.82~~  $\pm 9.72$   $\pm 9.61\%$  ( $0.17 \pm 1.66$  mm). This ~~underestimation~~ ~~overestimation~~ is more evident during daytime (i.e., ~~3.13~~ ~~3.12~~  $\pm 10.06\%$  ~~or 0.34~~ ~~9.93%~~ ~~or 0.35~~  $\pm 1.72$   $\pm 1.71$  mm) due to the ~~known radiation~~ dry bias effect, ~~while during that affect the radiosondes~~ (e.g., Vömel et al., 2007), which is more pronounced for TPW values less than 10 mm (Fig. 8b). During nighttime the differences are almost negligible (i.e., ~~0.45~~ ~~0.50~~  $\pm 9.17\%$  ~~or 0.005~~ ~~9.10%~~ ~~or -0.01~~  $\pm 1.584$   $\pm 1.57$  mm).

The two datasets are highly correlated (Fig. 57a;  $R^2 = 0.97$ ), with the majority of the points to be over the  $y = x$  line. However, for the higher values of TPW (i.e.,  $TPW > 30$  mm) an increased scatter of the data is observed, without being significant high. The histogram of the relative differences between the two instruments approximates a normal distribution, peaking at about 1% (Fig. 5b) ~~7b~~, but according to the Shapiro–Wilk test for normality (Shapiro and Wilk, 1965) it does not follow a Gaussian distribution. About 96% of the data are between  $\pm 20\%$ , while  $\sim 78\%$  lie in the range  $\pm 10\%$ . The difference between the two datasets has a small dependence from the TPW amount of ~~-0.171~~ ~~0.169%~~  $\text{mm}^{-1}$  (Fig. 68a). This dependence is more evident for the daytime measurements (i.e., for radiosondes launched at 1200 UTC; Fig. 68b), while for the nighttime measurements the dependence is almost negligible (i.e., ~~-0.088~~ ~~0.092~~  $\pm 0.052\%$   $\text{mm}^{-1}$ ; Fig. 68c). The best agreement between the two datasets is achieved for TPW values ranging between 15 and 35 mm. The increased difference for TPW values higher than 40 mm cannot be fully evaluated due to the very small number of observations ~~(i.e., just 19 measurements)~~.

### 3.4 Comparison of Cimel V2 and V3

To assess the differences of the TPW derived from the newly released Version 3 from AERONET and the previous Version 2, ~~only~~ their common measurements were used. The difference in the number of observations between the two Versions (see Table 1) arises from the fact that they have different quality control and cloud screening procedures (~~Giles et al., 2016~~) (~~Giles et al., 2019~~). A total number of 27707 common observations between the two Versions were extracted for comparison. In general, the differences between the two Versions are small, ranging ~~in general~~ between  $\pm 2\%$  and rarely exceed 5%, with V2 having higher values than V3 (Fig. 7) ~~9 a) and b)~~. The overall difference between the two datasets for the period 2007–2016 is  $0.60 \pm 20.91\%$  ( $0.08 \pm 20.14$  mm). The ~~largest differences occur in periods after the calibration, while some others may be due to the degradation of the filters because of aging and temperature effects, associated with the different way that the temperature coefficients are calculated.~~ differences at the AOD at 870 nm between the two different algorithm versions (Fig. 9 c) are generally pretty low and rarely exceed the  $\pm 0.01$  AOD units. The cyclic nature of the AOD differences (Fig. 9 c) suggests the variation of the AOD with temperature for Version 2. The V2 data are not temperature corrected for the 870nm filter and this produces a difference in AOD between temperature corrected (V3) and not corrected (V2) due to this specific filter before 2009. The 870nm filter was changed in 2009 in this specific instrument and its dependence on temperature was a magnitude lower than the initial filter. As a result, the filter used in the instrument from 2009 and onward shows less deviation from V2 since the temperature correction needed for the filter is minimal. This is a clear example of how implementation of temperature correction in Version 3 significantly improved the AOD and TPW, before 2009.

To further evaluate the differences between TPW from the two different Versions of the AERONET algorithm, a series of factors that could affect the measurements (i.e., the total amount of TPW, the SZA, the sensor temperature and the differences at the AOD at 870 nm) were examined. No significant dependence was found with ~~the SZA~~ SZA when comparing the two versions. The relative difference between V2 and V3 shows a dependence ~~from on~~ TPW (Fig. 810a). The biggest differences (i.e.,  $\sim 2.5\%$ ) are observed for TPW values lower than 10 mm, while the agreement between the two datasets improves with increased TPW values. However, the decrease in the relative difference of TPW between V2 and V3 is due to the different treatment of the temperature correction in the versions. As shown in Fig. 23 the lowest TPW values appear during wintertime, when the temperature is low as well. Corresponding to these low temperature values the differences between V2 and V3 shows a mean maximum value of  $\sim 2.5\%$  (Fig. 810b). A very pronounced dependence is also seen by the temperature of the internal sensor of the instrument. This dependence is due to the different temperature coefficients in the two versions of the retrieval algorithm. For V2 the temperature coefficients are based on the manufacturer specifications, while in V3 the temperature characterization is based on laboratory measurements during the calibration of the instrument. The highest positive differences, the order of  $\sim 2.55\%$  appear for low temperatures ( $< 10^\circ\text{C}$ ). For the whole range of temperatures that are recorded in the instrument (i.e.,  $\sim 50^\circ\text{C}$ ) a total difference of up to 2.55% is observed (Fig. 810b).

### 3.5 Comparison between Cimel and radiosondes

To have a better overview about how the differences between the two versions affect the agreement with the other instruments, the evaluation of Cimel measurements with radiosondes and microwave radiometer was based on the common dataset between the two different algorithm version (section 3.4). ~~Because Cimel does not measure during nighttime and~~ Since this Cimel model is not capable of nighttime measurements, the comparison is limited to daytime measurements only (i.e., radiosondes launched at 1200 UTC). To account for spatial and temporal differences, the same procedure with the one described for the comparison between microwave radiometer and radiosondes was used (i.e., averaging all Cimel points over an interval of 20 40 min centered on the radiosonde launching time). Thus, a total number of 565 682 common measurements were identified.

The differences between Cimel and radiosondes range between  $\pm 20\%$  Fig. 911, while the overall mean difference is  ~~$-2.04 \pm 1.95 \pm 10.62 \pm 10.97\%$~~  (or  ~~$-0.37 \pm 0.39 \pm 2.05 \pm 2.1$  mm~~) and  ~~$-2.81 \pm 2.74 \pm 10.23 \pm 10.56\%$~~  (or  ~~$-0.48 \pm 0.50 \pm 1.97 \pm 2.05$  mm~~), for V2 and V3 respectively. These results are in agreement with previous studies which showed that AERONET sun-photometers generally underestimate TPW in comparison with other instruments (~~Campmany et al., 2010; Pérez-Ramírez et al., 2014; Gui et al., 2017; Can~~ (Schneider et al., 2010; Campmany et al., 2010; Pérez-Ramírez et al., 2014; Gui et al., 2017; Campanelli et al., 2018)). The Version 3 shows an increased underestimation of TPW in comparison with the radiosondes, however the standard deviation is slightly better than in the previous version (Fig. 911b).

The TPW from both versions is highly correlated with the TPW from the radiosondes (i.e., ~~the correlation coefficient is 0.974 and 0.976 for R-squared is 0.95 for both~~ CV2 and CV3, ~~respectively;~~ Fig. 1012a and Fig. 1012c), with the slope of the least square regression line to be very close to unity. The histogram of the relative differences between the two datasets approximates a normal distribution, having a very small kurtosis towards negative values, for both CV2 and CV3 (Figs. 1012b and d). According to the Shapiro–Wilk test for normality (Shapiro and Wilk, 1965) it does not follow a Gaussian distribution.



For CV2 about 65% of the differences are between  $\pm 10\%$ , while  $\sim 93\%$  are between  $\pm 20\%$ . For CV3 the respective numbers are 67% and 93%. The low number of the coincidence measurements, and their big scatter among different SZAs, TPWs and temperatures of the sensor, do not allow a further evaluation of the influences from these factors.

### 3.6 Comparison between Cimel and Radiometer

- 5 The comparison between Cimel and microwave radiometer is based on their coincidence measurements, with the microwave radiometer observations averaged over a 1-min interval. This common dataset consists of 8505 observations for the period December 2009–May 2016. The differences between the TPW from both versions of AERONET algorithms are in generally between  $\pm 10\%$  Fig. ~~H13~~. Cimel underestimates the TPW by  $2.75 \pm 5.85\%$  (or  $0.70 \pm 1.22$  mm) and  $3.57 \pm 5.54\%$  (or  $0.81 \pm 1.17$  mm), for V2 and V3, respectively. ~~Some periods with increased underestimation (i.e., mid-2012) may be due to calibration issues, because after the Cimel calibration (i.e., at the beginning of 2013) the observed degradation stopped~~The comparison of the Cimel with the MWV reveals a lower overall uncertainty of  $\sim 6\%$  estimated as the 1-sigma of the mean difference, compared to the one ( $\sim 10\%$ ) that was calculated from the comparison of Cimel with the Radiosondes. This lower uncertainty can be attributed to the collocation of the Cimel and MWV and subsequently the sounding of the same airmasses from both instruments. The distance between RADO site and the radiosondes launching site increase the estimated uncertainty of the
- 15 retrieved TPW from Cimel sunphotometer, however it still remains within the limits that have been estimated by other studies in the past (e.g., Schneider et al., 2010; Pérez-Ramírez et al., 2014).

The TPW from Cimel (both CV2 and CV3) and microwave radiometer are highly correlated (Figs. ~~I214~~a and c;  $R^2 = \del{0.993}{0.99}$ ). Taking into consideration that the microwave radiometer and the Cimel have the same diurnal variations (section 3.2) a very high correlation of the two datasets was expected. For higher values of TPW there is a deviation from the identity

20 line.

The histogram of the relative differences between the two datasets approximates a normal distribution, having a very small flattening towards negative values, for both CV2 and CV3 (Figs. ~~I214~~b and d). According to the Shapiro–Wilk test for normality (Shapiro and Wilk, 1965) it does not follow a Gaussian distribution. For CV2 about 88% of the differences lie between  $\pm 10\%$ , while almost the entirely dataset is between  $\pm 20\%$  ( $>99\%$ ). For CV3 the respective values are similar. These

25 results show a very good agreement between the two different methods for the retrieval of TPW.

The difference of the TPW between the Cimel and the microwave radiometer do ~~now-not~~ show a pronounced dependence ~~from-on~~ the SZA (Figs. ~~I315~~a and b), for both versions of AERONET algorithms. However, there is an increased scatter for SZAs higher than  $70^\circ$ . ~~We speculate that this~~ This is due to the ~~increased-stray-light-clock shift effect (see Section 3.2)~~ that can affect the direct sun measurements from the Cimel sun-photometer at high airmasses, resulting in an increased uncertainty on

30 the retrieved TPW.

The difference of the TPW between Cimel and ~~microwave-radiometer-MWR~~ has a small dependence ~~with-on~~ the total amount of TPW of  $-1.97\%$  per 10 mm for CV2 and  $-1.38\%$  per 10 mm for CV3 (Figs. ~~I315~~c and d). The lower dependence of TPW from CV3 ~~from-on~~ the total amount of TPW in comparison with CV2 is an indication that the changes applied in the newer version of the algorithm is towards the right direction. Both versions show a higher variability for TPW values lower



than 10 mm due to the increased uncertainty of both instruments for dry conditions. However, this variability is based on a relative low number of observations and is highly affected from some outliers observed (i.e., differences ~~higher~~ >20%) for extremely low TPW values (i.e., 1.5–2 mm). When the TPW values lower than 10 mm are excluded from the analysis, the dependence of the difference between Cimel and MWR becomes -1.69% per 10 mm and -1.19% per 10 mm, for V2 and V3 respectively. In addition the very low variability for TPW values higher than 40 mm cannot be evaluated because is based on a very limited number of observations (i.e., six observations).

The new laboratory based temperature coefficients for the sun-photometer filters, improve the quality of the retrieved TPW from Cimel, as it can be depicted from the comparison with the MWV (Fig. ~~13~~15f). The dependence of the difference between CV3 and the MWV from the temperature recorded in the sensor of the Cimel photometer, is substantially improved in comparison with the one of CV2 (the order of -0.61% per 10°C and -1.07% per 10°C, for CV3 and CV2, respectively; Fig. ~~13~~15e and f). Thus the corrections from the application of the new temperature coefficients are important, since they significantly improve the quality of the retrieved TPW for all the operating temperatures.

## 4 Conclusions

In this study different measurements techniques for TWP (e.g., radiosonde, microwave radiometer, Cimel sun-photometer) were compared over a period of nine years. The microwave radiometer and Cimel sun-photometer operated at the RADO observatory situated at a distance of approximately 10 km from the Bucharest city center. The radiosondes measurements were provided by the Romanian National Meteorological Administration, approximately ~~18~~30 km from the RADO facilities. The main conclusions of this study can be summarized as follow:

- All three instruments depict the same annual cycle of TPW despite their different sampling rates. Some small differences observed in the monthly mean values can be attributed to the different schedule (i.e., microwave radiometer operates both during daytime and nighttime, while Cimel only during daytime and under clear sky conditions) and their different sample, partly due to the existing gaps in MWV and Cimel.
- The ~~measurements~~ Cimel measurements are affected by the clear sky bias, which is more pronounced during winter and can lead to values lower up to 25% for January compared to the radiosondes. The clear sky bias is almost negligible during summer months.
- The measurements of the microwave radiometer are highly correlated with those from radiosondes (i.e.,  $R = 0.98$ ), indicating that the microwave radiometer can capture the environmental changes that lead to variations in TPW.
- Compared with the ~~microwave radiometer the radiosondes slightly underestimates radiosondes, the microwave radiometer slightly overestimates~~ the TPW especially during daytime measurements (i.e., ~~3.13~~3.12  $\pm$  ~~10.06%~~ 10.06% ~~or 0.34~~0.35  $\pm$  ~~1.74~~1.71 mm) due to the dry bias effect, while the difference between the two datasets during nighttime is almost negligible (i.e., ~~0.45~~0.50  $\pm$  ~~9.17%~~ 9.10% ~~or 0.0005~~0.001  $\pm$  ~~1.58~~1.57 mm). In addition, the differences between the two datasets

during nighttime show a very small dependence (i.e.,  $-0.088\text{--}0.092 \pm 0.052 \text{ mm}^{-1}$ ) ~~from-on~~ the total TPW amount, in conjunction with the daytime that have an increased dependency (i.e.,  $-0.250\text{--}0.169 \pm 0.058\text{--}0.057 \text{ mm}^{-1}$ ).

- Version 3 of the AERONET algorithm slightly underestimates TPW with an overall difference of  $0.60 \pm 20.91\%$  ( $0.08 \pm 20.14 \text{ mm}$ ), compared to Version 2.

5     – The differences of the TPW between the Versions 2 and 3 AERONET algorithms for their individual common measurements are small (i.e.,  $\pm 2\%$ ). The highest differences are observed for low temperatures of the internal sensor (i.e.,  $< 10^\circ\text{C}$ ), while the use of new laboratory based temperature coefficients has an effect of up to  $2.55\%$  for the whole range of the temperatures recorded by the instrument ( $\sim 50^\circ\text{C}$ ).

10    – The V2 and V3 AOD 870nm common values agree within 0.01 AOD and rare larger deviations are likely associated with different temperature coefficients applied in V2 and V3.

- TPW from Cimel is highly correlated with the radiosonde measurements (i.e.,  $R > 0.97$ ,  $R\text{-squared} = 0.99$ ) for both versions of the AERONET algorithm.

15    – ~~Comparison~~ Compared with the radiosondes, Cimel underestimates the TPW by  $2.04\text{--}1.95 \pm 10.62\text{--}10.97\%$  (or  $0.37\text{--}0.39 \pm 2.05\text{--}2.10 \text{ mm}$ ) for V2 and  $2.81\text{--}2.74 \pm 10.23\text{--}10.54\%$  (or  $0.48\text{--}0.50 \pm 1.97\text{--}2.05 \text{ mm}$ ) for V3 respectively. This underestimation is in agreement with previous studies comparing measurement from radiosondes and sun-photometers for different regions.

20    – When compared with the microwave radiometer, Cimel underestimates by  $2.75 \pm 5.85\%$  (or  $0.70 \pm 1.22 \text{ mm}$ ) for V2 and  $3.57 \pm 5.54\%$  (or  $0.81 \pm 1.17 \text{ mm}$ ) for ~~V2~~ V3. The two instruments have the same daily cycle, which shows the capability of Cimel to capture the daily variations in TPW. However, some discrepancies are observed during early morning or late afternoon, which ~~can be attributed to the SZA effect.~~ are induced from a shift in the Cimel clock resulting in a minor error in the calculation of the optical air mass. However, changes in the Cimel TPW are within uncertainty estimates. While the difference between Cimel and radiometer does not show any pronounced dependence from SZA, for SZAs  $> 70^\circ$  the differences show an increased scatter.

25    – The V3 has a lower dependence from the total TPW amount (i.e.,  $-0.138 \pm 0.012 \text{ mm}^{-1}$  compared with V2 (i.e.,  $-0.197 \pm 0.013 \text{ mm}^{-1}$ ). The new laboratory based temperature coefficients implemented in V3 reduced the dependence of the recorded differences between Cimel and microwave radiometer (i.e.,  $-0.107 \pm 0.012 \text{ }^\circ\text{C}^{-1}$  and  $-0.061 \pm 0.011 \text{ }^\circ\text{C}^{-1}$ , for V2 and V3 respectively).

- The implementation of the new temperature coefficients in V3, has significantly improved the quality of the retrieved TPW and AOD from Cimel measurements, especially before 2009, when the filter at 870 nm had higher sensitivity to temperature variations.

30    To our knowledge this is the first study to evaluate in depth the TPW retrieval from the newly released Version 3 of the ~~Aeronet~~ AERONET algorithm. The comparison with high quality independent measurements from radiosondes and a collocated radiometer shows that the absolute level of the differences in V3 from the other instruments is a little higher than in

V2. However, the one sigma uncertainty for V3 compared to the radiosondes is  $\sim 10\%$ , which is in accordance with previous studies for V2. This slightly increased uncertainty could be attributed due to the relatively high distance between the Cimel and the radiosonde launching site. Compared with the collocated MWR the estimated uncertainty is further reduced to less than 6%. V3 has a lower dependence from on the TPW and the internal sensor temperature, indicating an improvement of the product. Further evaluation which in principle should improve the TWP Cimel retrievals. Nevertheless, further evaluation is needed, especially for sites with different characteristics is required (i.e. mountain or marine environments). Although these findings are for a specific site, they are likely representative for other continental sites as well. A future study will investigate the accuracy of the nighttime TPW from Cimel lunar measurements, available at the RADO facilities since 2016, following the methodology applied in this study. Finally, the microwave radiometer shows a very good performance compared with the radiosondes, especially during nighttime when the differences between the two instruments are almost negligible. Thus, the microwave radiometer can be used in future studies related to the validation of satellite datasets both during day and night time.

*Data availability.* The data from the radiosondes for Bucharest (station id: 15420) are publicly available through the upper air observations database of the University of Wyoming at the link: <http://weather.uwyo.edu/upperair/sounding.html>. The Cimel sun-photometer data can be found at the AERONET website (<https://aeronet.gsfc.nasa.gov/>) under the site: Bucharest\_Inoe. The data from the microwave radiometer and the relative humidity from the meteorological station are available upon request. The sunshine duration and cloud fraction are available through the EUMETSAT's CM SAF web portal (<https://wui.cmsaf.eu/safira/action/viewProduktSearch>).

*Author contributions.* KF and GAE initiated the idea for this paper. KF performed the analysis for the biggest part of the manuscript with the aim of BA. DE was the responsible for the calibration of the microwave radiometer and produced the L2 data from the instrument. DMG provided important information about the V3 Aeronet and reviewed parts of the comparison of the two algorithms and of Cimel with the other instruments. MB performed the analysis for the sunshine duration and cloud coverage. LV was responsible in the past for the calibration of the microwave radiometer and local site manager of the Cimel sun-photometer. DN is the PI of the Bucharest\_INOE Aeronet station. KF and BA prepared the manuscript with contribution from all co-authors.

*Competing interests.* The authors declare that they have no conflict of interest.

*Acknowledgements.* The authors would like to thank the two anonymous reviewers for their constructive comments that significantly improved the manuscript. We thank the AERONET (PHOTONS) for instrument calibration and maintenance of the Cimel instrument and AERONET (GSFC) for processing and disseminating these data. This work has received funding from the European Union's Horizon 2020 Research and Innovation Programme, under grant agreement no. 692014, project ECARS (East European Centre for Atmospheric Remote

Sensing), and G.A. 654109 - ACTRIS 2, and the Romanian Ministry of Research and Innovation throughout the Core National Program, Proj. No. 33N/16.03.2018.

## References

- American Meteorological Society: Precipitable Water. Glossary of Meteorology, [Available online at [http://http://glossary.ametsoc.org/wiki/Precipitable\\_water](http://http://glossary.ametsoc.org/wiki/Precipitable_water)], 2018.
- Barreto, A., Cuevas, E., Damiri, B., Romero, P. M., and Almansa, F.: Column water vapor determination in night period with a lunar  
5 photometer prototype, *Atmospheric Measurement Techniques*, 6, 2159–2167, <https://doi.org/10.5194/amt-6-2159-2013>, 2013.
- Benas, N., Finkensieper, S., Stengel, M., van Zadelhoff, G.-J., Hanschmann, T., Hollmann, R., and Meirink, J. F.: The MSG-SEVIRI-based cloud property data record CLAAS-2, *Earth System Science Data*, 9, 415–434, <https://doi.org/10.5194/essd-9-415-2017>, 2017.
- Bevis, M., Businger, S., Herring, T. A., Rocken, C., Anthes, R. A., and Ware, R. H.: GPS meteorology: Remote sensing of atmospheric water vapor using the global positioning system, *Journal of Geophysical Research: Atmospheres*, 97, 15 787–15 801,  
10 <https://doi.org/10.1029/92JD01517>, <https://agupubs.onlinelibrary.wiley.com/doi/abs/10.1029/92JD01517>, 1992.
- Campanelli, M., Mascitelli, A., Sandò, P., Diémoz, H., Estellés, V., Federico, S., Iannarelli, A. M., Fratarcangeli, F., Mazzoni, A., Realini, E., Crespi, M., Bock, O., Martínez-Lozano, J. A., and Dietrich, S.: Precipitable water vapour content from ESR/SKYNET sun–sky radiometers: validation against GNSS/GPS and AERONET over three different sites in Europe, *Atmospheric Measurement Techniques*, 11, 81–94, <https://doi.org/10.5194/amt-11-81-2018>, 2018.
- 15 Campmany, E., Bech, J., Rodríguez-Marcos, J., Sola, Y., and Lorente, J.: A comparison of total precipitable water measurements from radiosonde and sunphotometers, *Atmospheric Research*, 97, 385–392, <https://doi.org/10.1016/j.atmosres.2010.04.016>, 2010.
- Carstea, E., Fragkos, K., Siomos, N., Antonescu, B., and Belegante, L.: Columnar aerosol measurements in a continental southeastern Europe site: Climatology and trends, *Theoretical and Applied Climatology*, accepted for publication, 2019.
- Cheval, S., Dumitrescu, A., and Bell, A.: Spatial sampling requirements for monitoring upper-air climate change with radiosondes, *Theor.*  
20 *Appl. Climatol.*, 97, 391–401, <https://doi.org/10.1007/s00704-008-0088-3>, 2009.
- Coddington, O., Lean, J. L., Pilewskie, P., Snow, M., and Lindholm, D.: A Solar Irradiance Climate Data Record, *Bulletin of the American Meteorological Society*, 97, 1265–1282, <https://doi.org/10.1175/BAMS-D-14-00265.1>, 2016.
- Ferrare, R. A., Melfi, S. H., Whiteman, D. N., Evans, K. D., Schmidlin, F. J., and Starr, D. O.: A Comparison of Water Vapor Measurements Made by Raman Lidar and Radiosondes, *Journal of Atmospheric and Oceanic Technology*, 12, 1177–1195, [https://doi.org/10.1175/1520-0426\(1995\)012<1177:ACOWVM>2.0.CO;2](https://doi.org/10.1175/1520-0426(1995)012<1177:ACOWVM>2.0.CO;2), 1995.  
25
- Filioglou, M., Nikandrova, A., Niemelä, S., Baars, H., Mielonen, T., Leskinen, A., Brus, D., Romakkaniemi, S., Giannakaki, E., and Kompula, M.: Profiling water vapor mixing ratios in Finland by means of a Raman lidar, a satellite and a model, *Atmospheric Measurement Techniques*, 10, 4303–4316, <https://doi.org/10.5194/amt-10-4303-2017>, 2017.
- Finkensieper, S., Meirink, J.-F., van Zadelhoff, G.-J., Hanschmann, T., Benas, N., Stengel, M., Fuchs, P., Hollmann, R., and Werscheck, M.: CLAAS-2: CM SAF CLOUD property dAtAset using SEVIRI - Edition 2, *Satellite Application Facility on Climate Monitoring*,  
30 [https://doi.org/10.5676/EUM\\_SAF\\_CM/CLAAS/V002](https://doi.org/10.5676/EUM_SAF_CM/CLAAS/V002), 2016.
- Gaffen, D. J. and Elliott, W. P.: Column Water Vapor Content in Clear and Cloudy Skies, *Journal of Climate*, 6, 2278–2287, [https://doi.org/10.1175/1520-0442\(1993\)006<2278:CWVCIC>2.0.CO;2](https://doi.org/10.1175/1520-0442(1993)006<2278:CWVCIC>2.0.CO;2), 1993.
- Gamache, R. R., Roller, C., Lopes, E., Gordon, I. E., Rothman, L. S., Polyansky, O. L., Zobov, N. F., Kyuberis, A. A., Tennyson, J., Yurchenko, S. N., Császár, A. G., Furtenbacher, T., Huang, X., Schwenke, D. W., Lee, T. J., Drouin, B. J., Tashkun, S. A.,  
35 Perevalov, V. I., and Kochanov, R. V.: Total internal partition sums for 166 isotopologues of 51 molecules important in planetary

- atmospheres: Application to HITRAN2016 and beyond, *Journal of Quantitative Spectroscopy and Radiative Transfer*, 203, 70 – 87, <https://doi.org/https://doi.org/10.1016/j.jqsrt.2017.03.045>, HITRAN2016 Special Issue, 2017.
- Giles, D., Holben, B., Smirnov, A., Eck, T., Slutsker, I., Sorokin, M., Schafer, J., and Sinyuk, A.: Evaluation of AERONET AOD Measurements in the Version 3 Database, in: *Lidar Data and its use in Model Verification and Data Assimilation*, [https://aeronet.gsfc.nasa.gov/new\\_web/Documents/AERONET\\_V3\\_AOD.pdf](https://aeronet.gsfc.nasa.gov/new_web/Documents/AERONET_V3_AOD.pdf), July 12–14, 2016, College Park, MD, USA, 2016.
- Giles, D. M., Sinyuk, A., Sorokin, M. G., Schafer, J. S., Smirnov, A., Slutsker, I., Eck, T. F., Holben, B. N., Lewis, J. R., Campbell, J. R., Welton, E. J., Korkin, S. V., and Lyapustin, A. I.: Advancements in the Aerosol Robotic Network (AERONET) Version 3 database – automated near-real-time quality control algorithm with improved cloud screening for Sun photometer aerosol optical depth (AOD) measurements, *Atmospheric Measurement Techniques*, 12, 169–209, <https://doi.org/10.5194/amt-12-169-2019>, 2019.
- 10 Gui, K., Che, H., Chen, Q., Zeng, Z., Liu, H., Wang, Y., Zheng, Y., Sun, T., Liao, T., Wang, H., and Zhang, X.: Evaluation of radiosonde, MODIS-NIR-Clear, and AERONET precipitable water vapor using IGS ground-based GPS measurements over China, *Atmospheric Research*, 197, 461–473, <https://doi.org/https://doi.org/10.1016/j.atmosres.2017.07.021>, 2017.
- Halthore, R. N., Eck, T. F., Holben, B. N., and Markham, B. L.: Sun photometric measurements of atmospheric water vapor column abundance in the 940-nm band, *Journal of Geophysical Research: Atmospheres*, 102, 4343–4352, <https://doi.org/10.1029/96JD03247>, 1997.
- 15 Holben, B. N., Eck, T. F., Slutsker, I., Tanré, D., Buis, J. P., Setzer, A., Vermote, E., Reagan, J. A., Kaufman, Y. J., Nakajima, T., Lavenu, F., Jankowiak, I., and Smirnov, A.: AERONET—A Federated Instrument Network and Data Archive for Aerosol Characterization, *Remote Sensing of Environment*, 66, 1–16, [https://doi.org/https://doi.org/10.1016/S0034-4257\(98\)00031-5](https://doi.org/https://doi.org/10.1016/S0034-4257(98)00031-5), 1998.
- Holben, B. N., Tanré, D., Smirnov, A., Eck, T. F., Slutsker, I., Abuhassan, N., Newcomb, W. W., Schafer, J. S., Chatenet, B., Lavenu, F., Kaufman, Y. J., Castle, J. V., Setzer, A., Markham, B., Clark, D., Frouin, R., Halthore, R., Karneli, A., O'Neill, N. T., Pietras, C., Pinker, R. T., Voss, K., and Zibordi, G.: An emerging ground-based aerosol climatology: Aerosol optical depth from AERONET, *Journal of Geophysical Research: Atmospheres*, 106, 12 067–12 097, <https://doi.org/10.1029/2001JD900014>, 2001.
- 20 IPCC: Summary for Policymakers, in: *Climate Change 2013 - The Physical Science Basis*, edited by Intergovernmental Panel on Climate Change, pp. 1–30, Cambridge University Press, Cambridge, <https://doi.org/10.1017/CBO9781107415324.004>, [https://www.cambridge.org/core/product/identifier/CBO9781107415324A009/type/book/{\\_}part](https://www.cambridge.org/core/product/identifier/CBO9781107415324A009/type/book/{_}part), 2013.
- 25 Kothe, S., Pfeifroth, U., Cremer, R., Trentmann, J., and Hollmann, R.: A Satellite-Based Sunshine Duration Climate Data Record for Europe and Africa, *Remote Sensing*, 9, <https://doi.org/10.3390/rs9050429>, 2017.
- Liang, H., Cao, Y., Wan, X., Xu, Z., Wang, H., and Hu, H.: Meteorological applications of precipitable water vapor measurements retrieved by the national GNSS network of China, *Geodesy and Geodynamics*, 6, 135–142, <https://doi.org/10.1016/J.GEOG.2015.03.001>, 2015.
- McCarthy, M. P.: Spatial sampling requirements for monitoring upper-air climate change with radiosondes, *Int. J. Climatol.*, 28, 985–993, <https://doi.org/10.1002/joc.1611>, 2008.
- 30 Mears, C. A., Wang, J., Smith, D., and Wentz, F. J.: Intercomparison of total precipitable water measurements made by satellite-borne microwave radiometers and ground-based GPS instruments, *Journal of Geophysical Research: Atmospheres*, 120, 2492–2504, <https://doi.org/10.1002/2014JD022694>, 2015.
- Miloshevich, L. M., Vömel, H., Whiteman, D., and Leblanc, T.: Accuracy assessment and correction of Vaisala RS92 radiosonde water vapor measurements, *Journal of Geophysical Research: Atmospheres*, 114, <https://doi.org/10.1029/2008JD011565>, 2009.
- 35 Mlawer, E. J., Payne, V. H., Moncet, J.-L., Delamere, J. S., Alvarado, M. J., and Tobin, D. C.: Development and recent evaluation of the MT\_CKD model of continuum absorption, *Philosophical Transactions of the Royal Society A: Mathematical, Physical and Engineering Sciences*, 370, 2520–2556, <https://doi.org/10.1098/rsta.2011.0295>, 2012.

- Paynter, D. and Ramaswamy, V.: Variations in water vapor continuum radiative transfer with atmospheric conditions, *J. Geophys. Res.*, p. D16310, <https://doi.org/10.1029/2012JD017504>, 2012.
- Pérez-Ramírez, D., Whiteman, D. N., Smirnov, A., Lyamani, H., Holben, B. N., Pinker, R., Andrade, M., and Alados-Arboledas, L.: Evaluation of AERONET precipitable water vapor versus microwave radiometry, GPS, and radiosondes at ARM sites, *Journal of Geophysical Research: Atmospheres*, 119, 9596–9613, <https://doi.org/10.1002/2014JD021730>, 2014.
- Pfelfroth, U., Kothe, S., Müller, R., Trentmann, J., Hollmann, R., Fuchs, P., and Werscheck, M.: Surface Radiation Data Set - Heliosat (SARAH) - Edition 2, Satellite Application Facility on Climate Monitoring, [https://doi.org/10.5676/EUM\\_SAF\\_CM/SARAH/V002](https://doi.org/10.5676/EUM_SAF_CM/SARAH/V002), 2017.
- Raptis, P.-I., Kazadzis, S., Gröbner, J., Kouremeti, N., Doppler, L., Becker, R., and Helmis, C.: Water vapour retrieval using the Precision Solar Spectroradiometer, *Atmospheric Measurement Techniques*, 11, 1143–1157, <https://doi.org/10.5194/amt-11-1143-2018>, 2018.
- Reber, E. E. and Swope, J. R.: On the Correlation of the Total Precipitable Water in a Vertical Column and Absolute Humidity at the Surface, *Journal of Applied Meteorology*, 11, 1322–1325, [https://doi.org/10.1175/1520-0450\(1972\)011<1322:OTCOTT>2.0.CO;2](https://doi.org/10.1175/1520-0450(1972)011<1322:OTCOTT>2.0.CO;2), 1972.
- Román, R., Antón, M., Cachorro, V., Loyola, D., Ortiz de Galisteo, J., de Frutos, A., and Romero-Campos, P.: Comparison of total water vapor column from GOME-2 on MetOp-A against ground-based GPS measurements at the Iberian Peninsula, *Science of The Total Environment*, 533, 317–328, <https://doi.org/10.1016/J.SCITOTENV.2015.06.124>, 2015.
- Rose, T., Crewell, S., Löhnert, U., and Simmer, C.: A network suitable microwave radiometer for operational monitoring of the cloudy atmosphere, *Atmospheric Research*, 75, 183–200, <https://doi.org/https://doi.org/10.1016/j.atmosres.2004.12.005>, 2005.
- Sapucci, L. F., Machado, L. A. T., Monico, J. F. G., and Plana-Fattori, A.: Intercomparison of Integrated Water Vapor Estimates from Multisensors in the Amazonian Region, *Journal of Atmospheric and Oceanic Technology*, 24, 1880–1894, <https://doi.org/10.1175/JTECH2090.1>, 2007.
- Schmid, B., Thorne, K. J., Demoulin, P., Peter, R., Mätzler, C., and Sekler, J.: Comparison of modeled and empirical approaches for retrieving columnar water vapor from solar transmittance measurements in the 0.94- $\mu\text{m}$  region, *Journal of Geophysical Research: Atmospheres*, 101, 9345–9358, <https://doi.org/10.1029/96JD00337>, 1996.
- Schneider, M., Romero, P. M., Hase, F., Blumenstock, T., Cuevas, E., and Ramos, R.: Continuous quality assessment of atmospheric water vapour measurement techniques: FTIR, Cimel, MFRSR, GPS, and Vaisala RS92, *Atmospheric Measurement Techniques*, 3, 323–338, <https://doi.org/10.5194/amt-3-323-2010>, 2010.
- Shapiro, S. S. and Wilk, M. B.: An analysis of variance test for normality (complete samples)<sup>†</sup>, *Biometrika*, 52, 591–611, <https://doi.org/10.1093/biomet/52.3-4.591>, 1965.
- Smirnov, A., Holben, B. N., Lyapustin, A., Slutsker, I., and Eck, T. F.: AERONET Processing Algorithms Refinement: Proceedings of AERONET Workshop, El Arenosillo, NASA/GSFC Aeronet Project, Spain, 2004.
- Sussmann, R., Borsdorff, T., Rettinger, M., Camy-Peyret, C., Demoulin, P., Duchatelet, P., Mahieu, E., and Servais, C.: Technical Note: Harmonized retrieval of column-integrated atmospheric water vapor from the FTIR network &ndash; first examples for long-term records and station trends, *Atmospheric Chemistry and Physics*, 9, 8987–8999, <https://doi.org/10.5194/acp-9-8987-2009>, 2009.
- Turner, D. D., Lesht, B. M., Clough, S. A., Liljegren, J. C., Revercomb, H. E., and Tobin, D. C.: Dry Bias and Variability in Vaisala RS80-H Radiosondes: The ARM Experience, *Journal of Atmospheric and Oceanic Technology*, 20, 117–132, [https://doi.org/10.1175/1520-0426\(2003\)020<0117:DBAVIV>2.0.CO;2](https://doi.org/10.1175/1520-0426(2003)020<0117:DBAVIV>2.0.CO;2), 2003.

- Turner, D. D., Clough, S. A., Liljegren, J. C., Clothiaux, E. E., Cady-Pereira, K. E., and Gaustad, K. L.: Retrieving liquid water path and precipitable water vapor from the Atmospheric Radiation Measurement (ARM) microwave radiometers, *IEEE Transactions on Geoscience and Remote Sensing*, 45, 3680–3690, 2007.
- 5 Van Malderen, R., Brenot, H., Pottiaux, E., Beirle, S., Hermans, C., De Mazière, M., Wagner, T., De Backer, H., and Bruyninx, C.: A multi-site intercomparison of integrated water vapour observations for climate change analysis, *Atmospheric Measurement Techniques*, 7, 2487–2512, <https://doi.org/10.5194/amt-7-2487-2014>, 2014.
- Vaquero-Martínez, J., Antón, M., Ortiz de Galisteo, J. P., Cachorro, V. E., Costa, M. J., Román, R., and Bennouna, Y. S.: Validation of MODIS integrated water vapor product against reference GPS data at the Iberian Peninsula, *International Journal of Applied Earth Observation and Geoinformation*, 63, 214–221, <https://doi.org/10.1016/J.JAG.2017.07.008>, 2017.
- 10 Vaquero-Martínez, J., Antón, M., Ortiz de Galisteo, J. P., Cachorro, V. E., Álvarez-Zapatero, P., Román, R., Loyola, D., Costa, M. J., Wang, H., Abad, G. G., and Noël, S.: Inter-comparison of integrated water vapor from satellite instruments using reference GPS data at the Iberian Peninsula, *Remote Sensing of Environment*, 204, 729–740, <https://doi.org/10.1016/J.RSE.2017.09.028>, 2018.
- Vaquero-Martínez, J., Antón, M., de Galisteo, J. P. O., Cachorro, V. E., Wang, H., Abad, G. G., Román, R., and Costa, M. J.: Validation of integrated water vapor from OMI satellite instrument against reference GPS data at the Iberian Peninsula, *Science of The Total Environment*, 15 580, 857–864, <https://doi.org/10.1016/J.SCITOTENV.2016.12.032>, 2017.
- Vömel, H., Selkirk, H., Miloshevich, L., Valverde-Canossa, J., Valdés, J., Kyrö, E., Kivi, R., Stolz, W., Peng, G., and Diaz, J. A.: Radiation Dry Bias of the Vaisala RS92 Humidity Sensor, *Journal of Atmospheric and Oceanic Technology*, 24, 953–963, <https://doi.org/10.1175/JTECH2019.1>, 2007.
- Wagner, T., Andreae, M. O., Beirle, S., Dörner, S., Mies, K., and Shaiganfar, R.: MAX-DOAS observations of the total atmospheric water vapour column and comparison with independent observations, *Atmospheric Measurement Techniques*, 6, 131–149, <https://doi.org/10.5194/amt-6-131-2013>, 2013.
- 20 Westwater, E. R. and Guiraud, F. O.: Ground-based microwave radiometric retrieval of precipitable water vapor in the presence of clouds with high liquid content, *Radio Science*, 15, 947–957, <https://doi.org/10.1029/RS015i005p00947>, 1980.



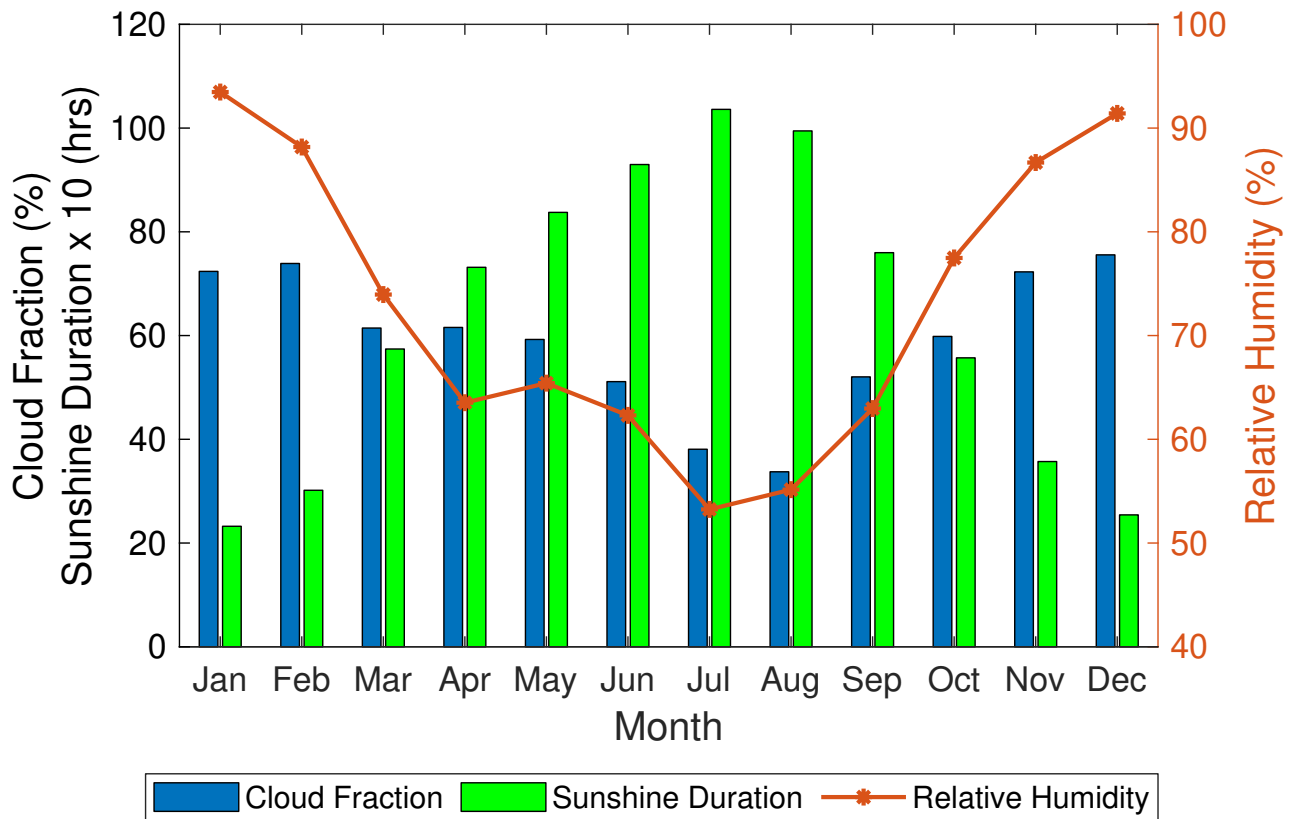

**Figure 1.** [Annual cycle of the cloud fraction, sunshine duration and relative humidity at Magurele \(adapted from Carstea et al. \(2019\) Figure 2\)](#)

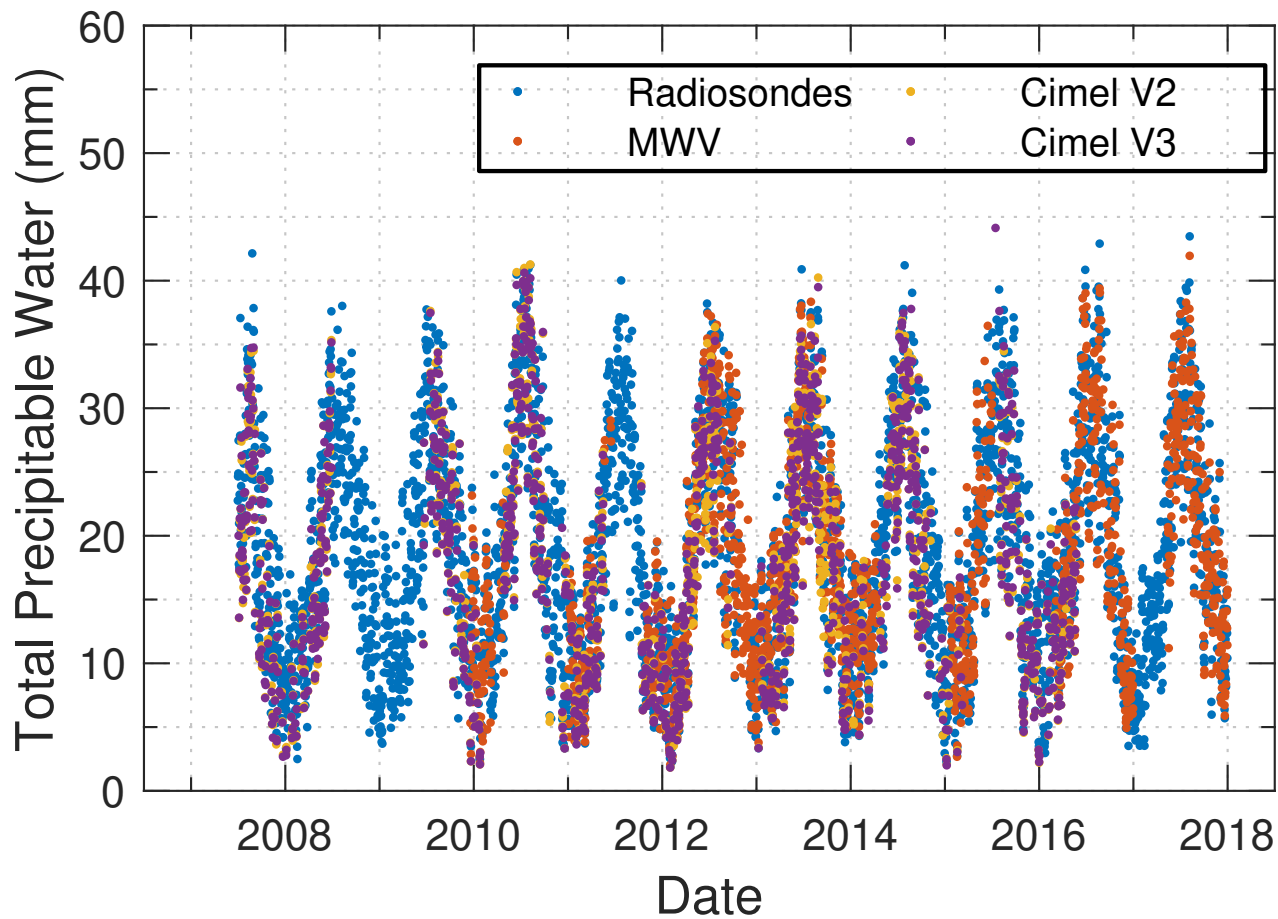

**Figure 2.** Time series of the daily mean values of the total precipitable water during the period 2007–2017 based on measurements from radiosondes (blue dots), microwave radiometer (orange dots), and Cimet sun-photometer Version 2 (yellow dots) and Version 3 (magenta dots) of the algorithm.

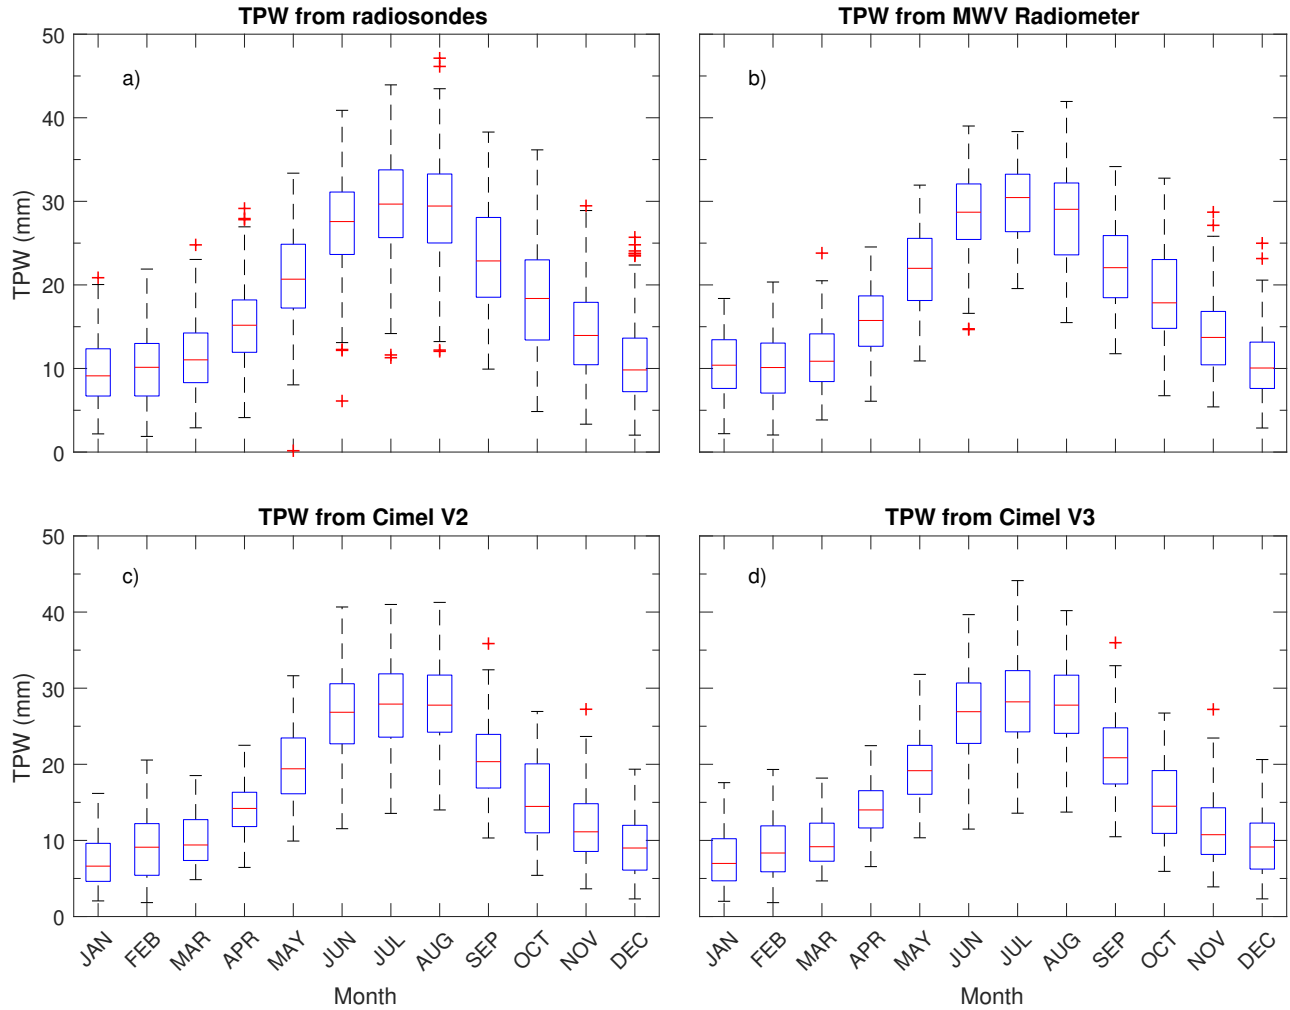

**Figure 3.** Monthly variation of total precipitable water from a) radiosondes during the period 2007—2017, b) microwave radiometer during the period 2009—2017, c) Cimel sun-photometer version 2 data, and d) cimel sun-photometer version 3 data for the period 2007—2016. The median value are shown as the red lines, the interquartile range (IQR) is spanned by the vertical bars and the whiskers show the 1.5IQR. The red + symbols shows the outliers in the datasets.

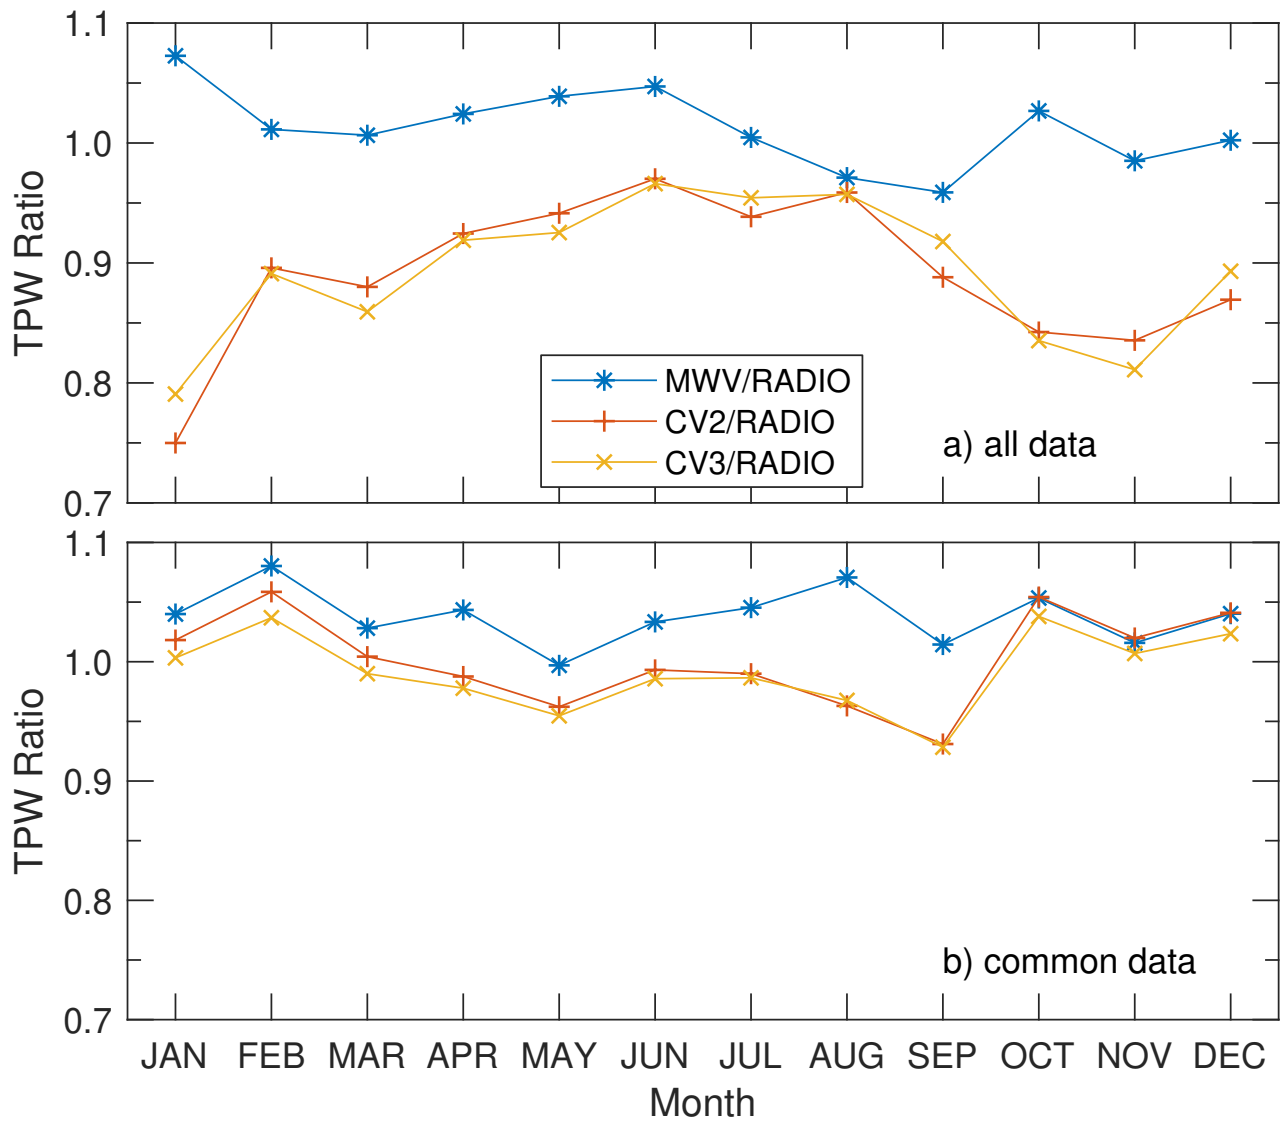

**Figure 4.** [Monthly ratio of TPW between microwave radiometer, Cimel V2 and V3 and radiosondes a\) for all the available measurements and b\) for their dataset.](#)

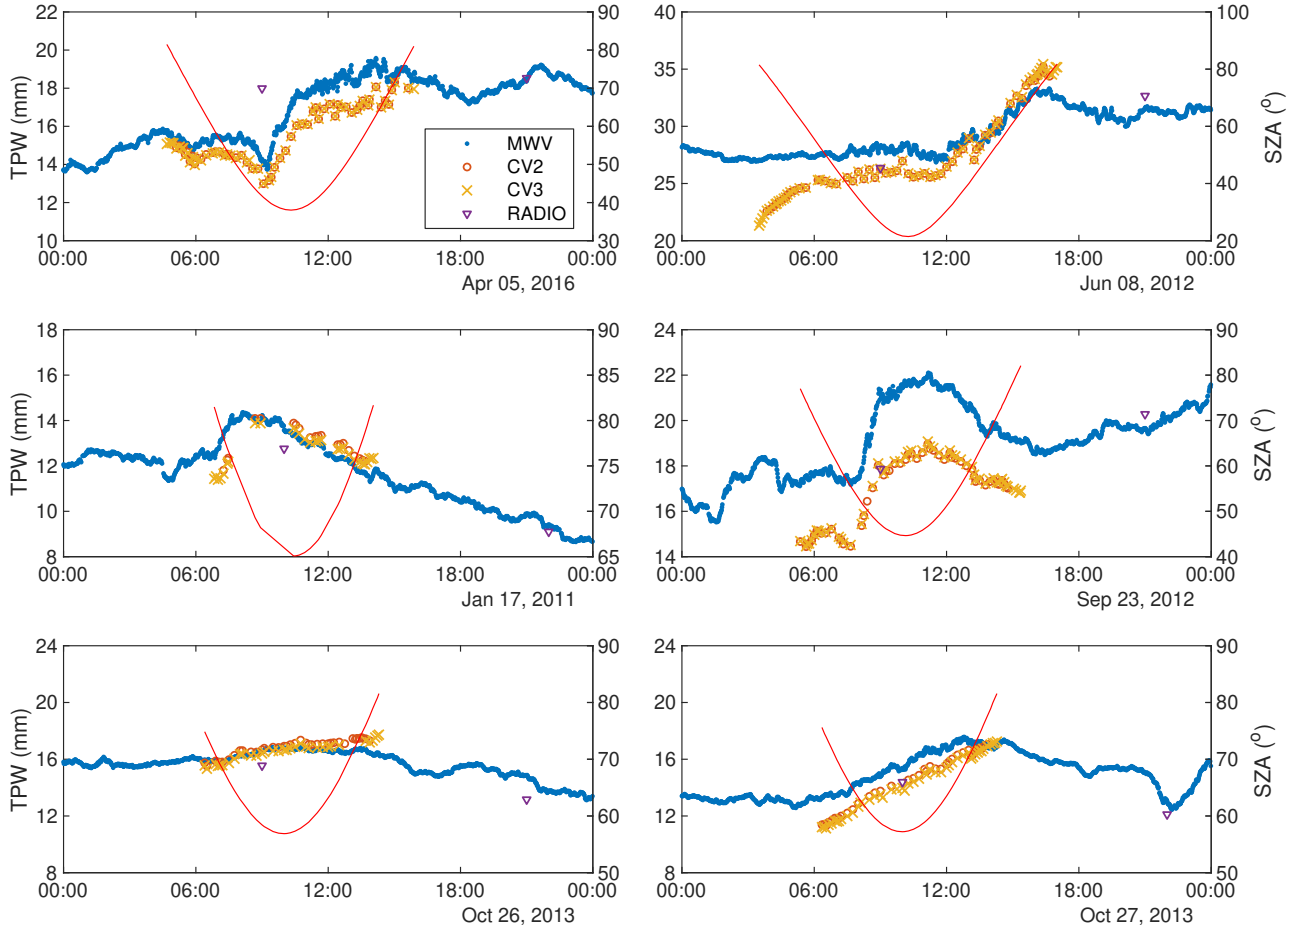

**Figure 5.** Diurnal variation of total precipitable water from radiosonde (magenta triangle), microwave radiometer (blue dots) and Cimel sun-photometer (V2 and V3 of the algorithm, red circle and ~~green~~-orange cross, respectively) for six randomly-selected days (i.e., with-to cover all seasons and have a relative high number of Cimel measurements). The time is in UTC (i.e., local time + 2 hours). The red line indicate the range of the SZAs that Cimel measurements were performed.

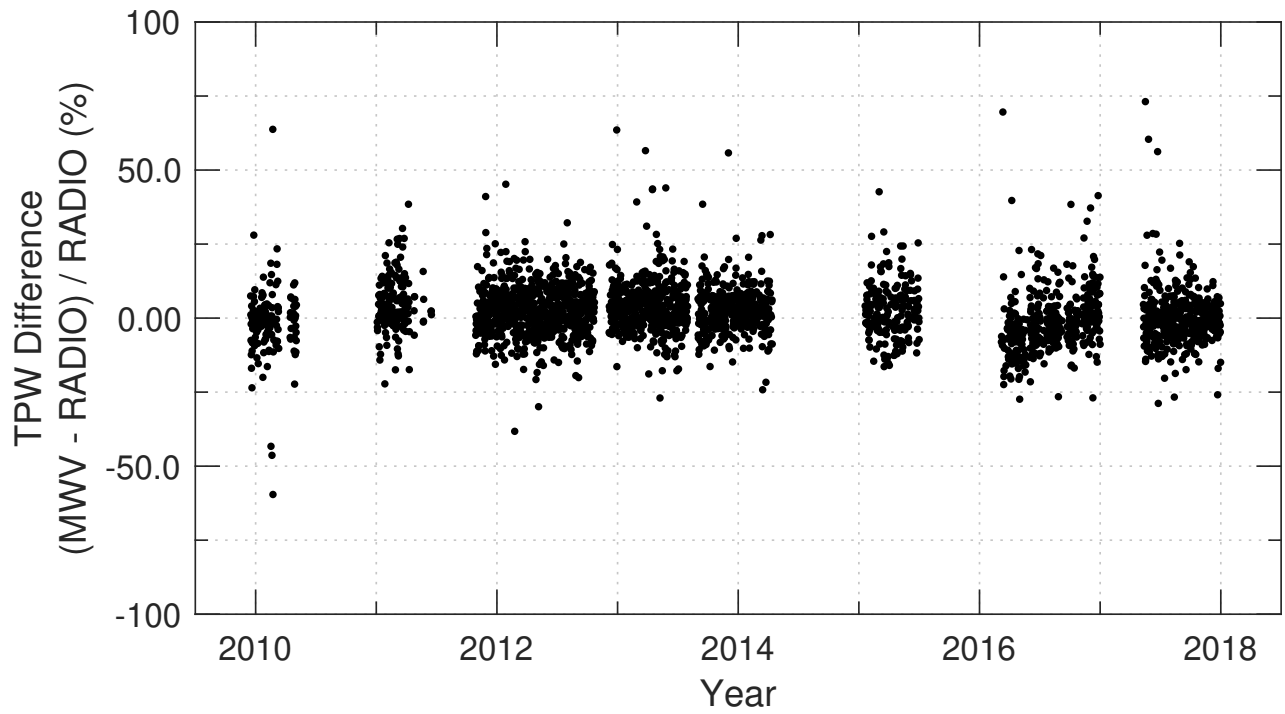

**Figure 6.** Time series of the relative difference (%) between the TPW from the microwave radiometer and the radiosonde during the period 2009—2017.

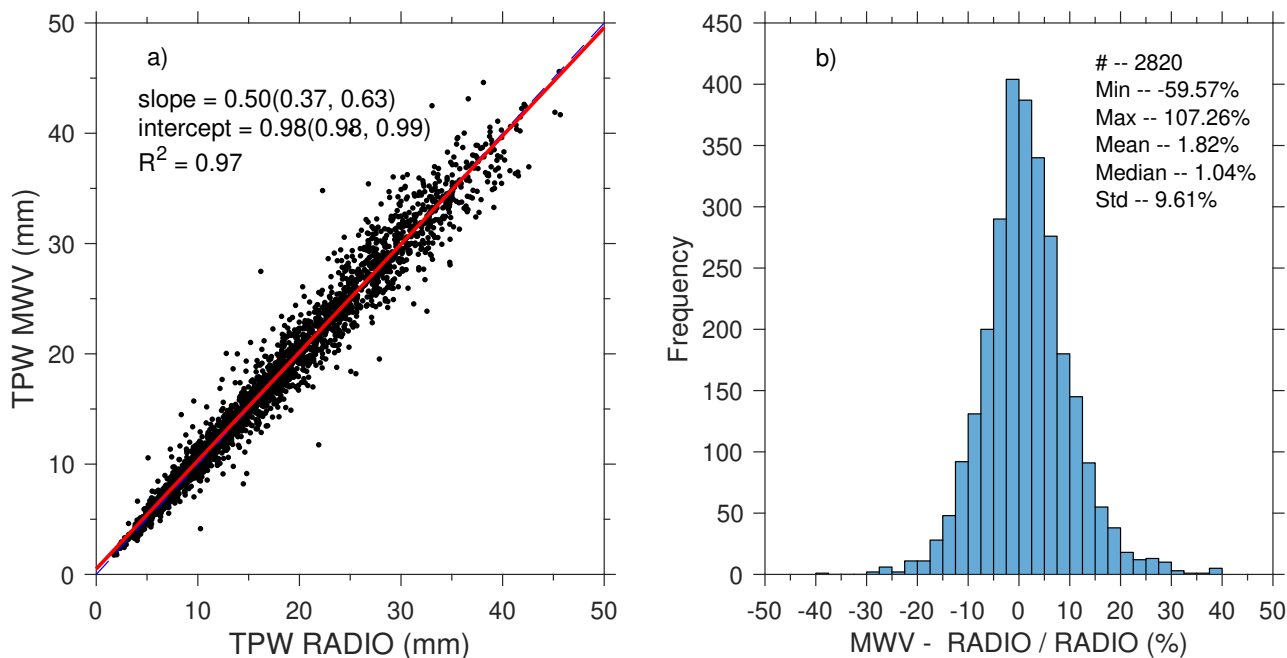

**Figure 7.** (a) Scatter plot of TPW values derived from microwave radiometer and radiosondes. The blue dashed line represents the identity line and the red solid line is the least square linear fit. The regression coefficients are displayed along with their 95% confidence interval (in parenthesis). (b) Frequency distribution of the relative mean difference in TPW between microwave radiometer and radiosondes in bins of 2.5% .

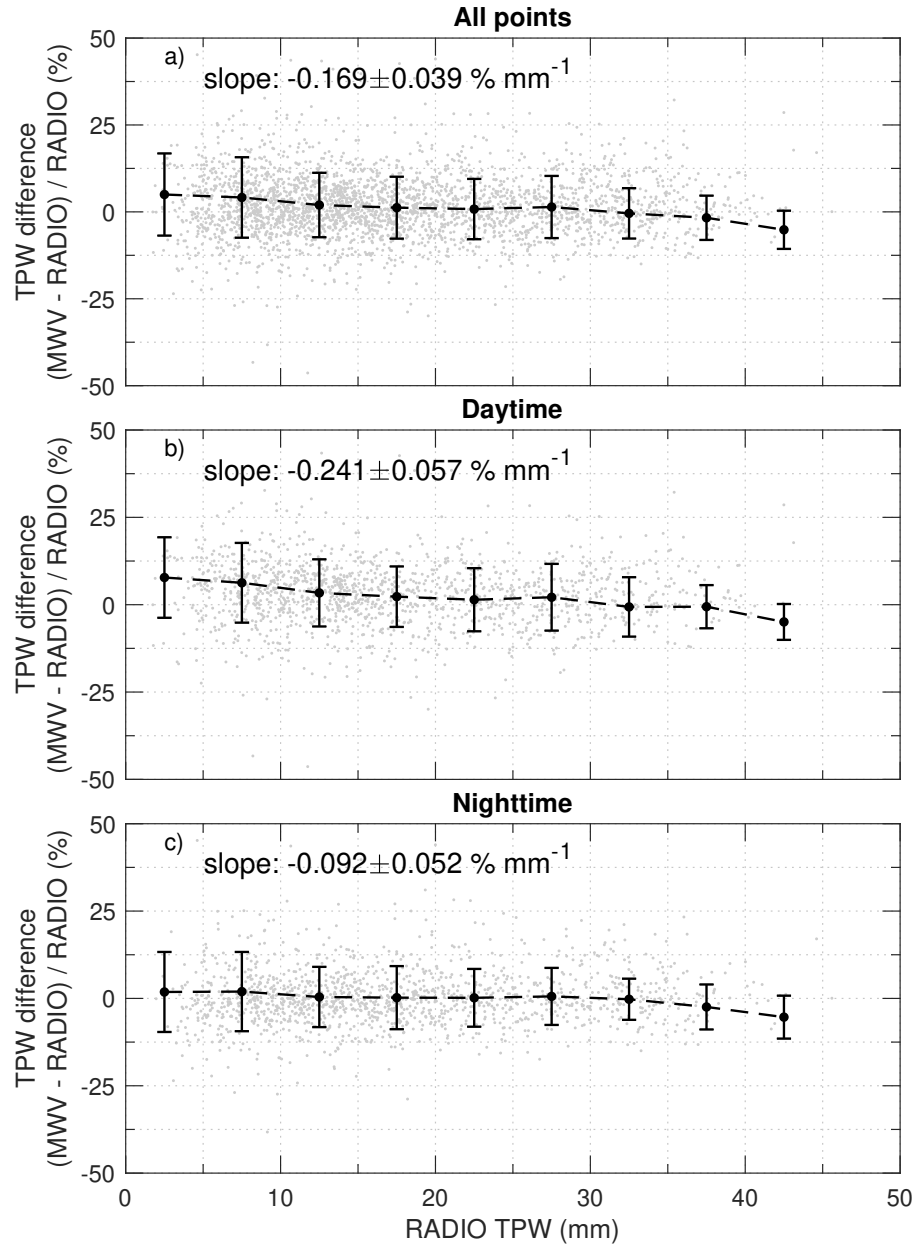

**Figure 8.** Dependence plot of the relative difference of the TPW from the microwave radiometer and the radiosondes from the total amount of TPW for (a) all points, (b) the daytime measurements, and (c) the nighttime measurements. The black dots show the average difference in bins of 5 mm and the error-bar ~~represents~~ represent their standard deviation. The linear fit is based on all measurements.



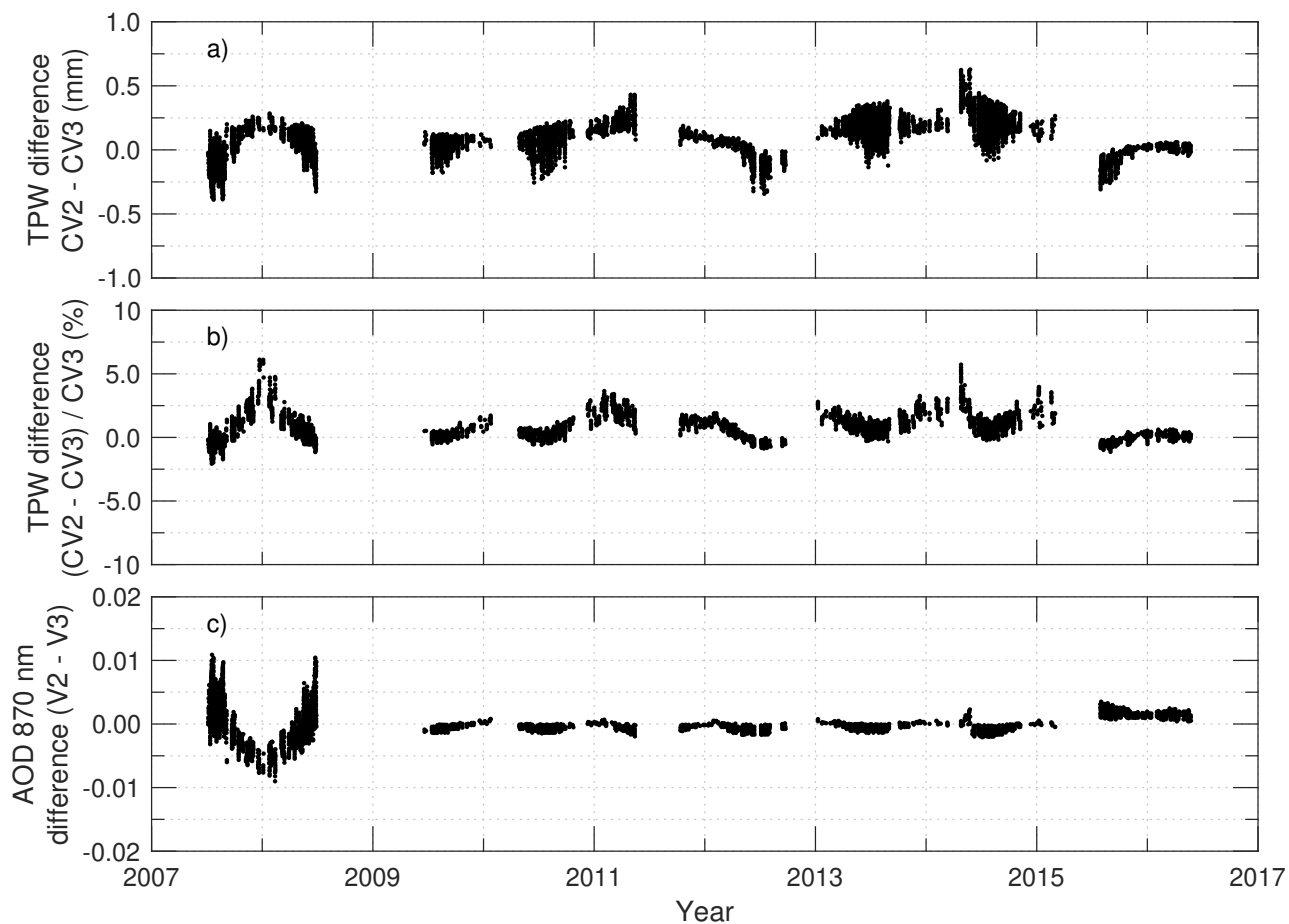

**Figure 9.** Time series of the (a) absolute and (b) relative differences between level 2.0 of V2 and V3 TPW and (c) differences of AOD at 870 nm between V2 and V3 from Cimel sun-photometer measurements, for their common measurements during the period 2007—2016.

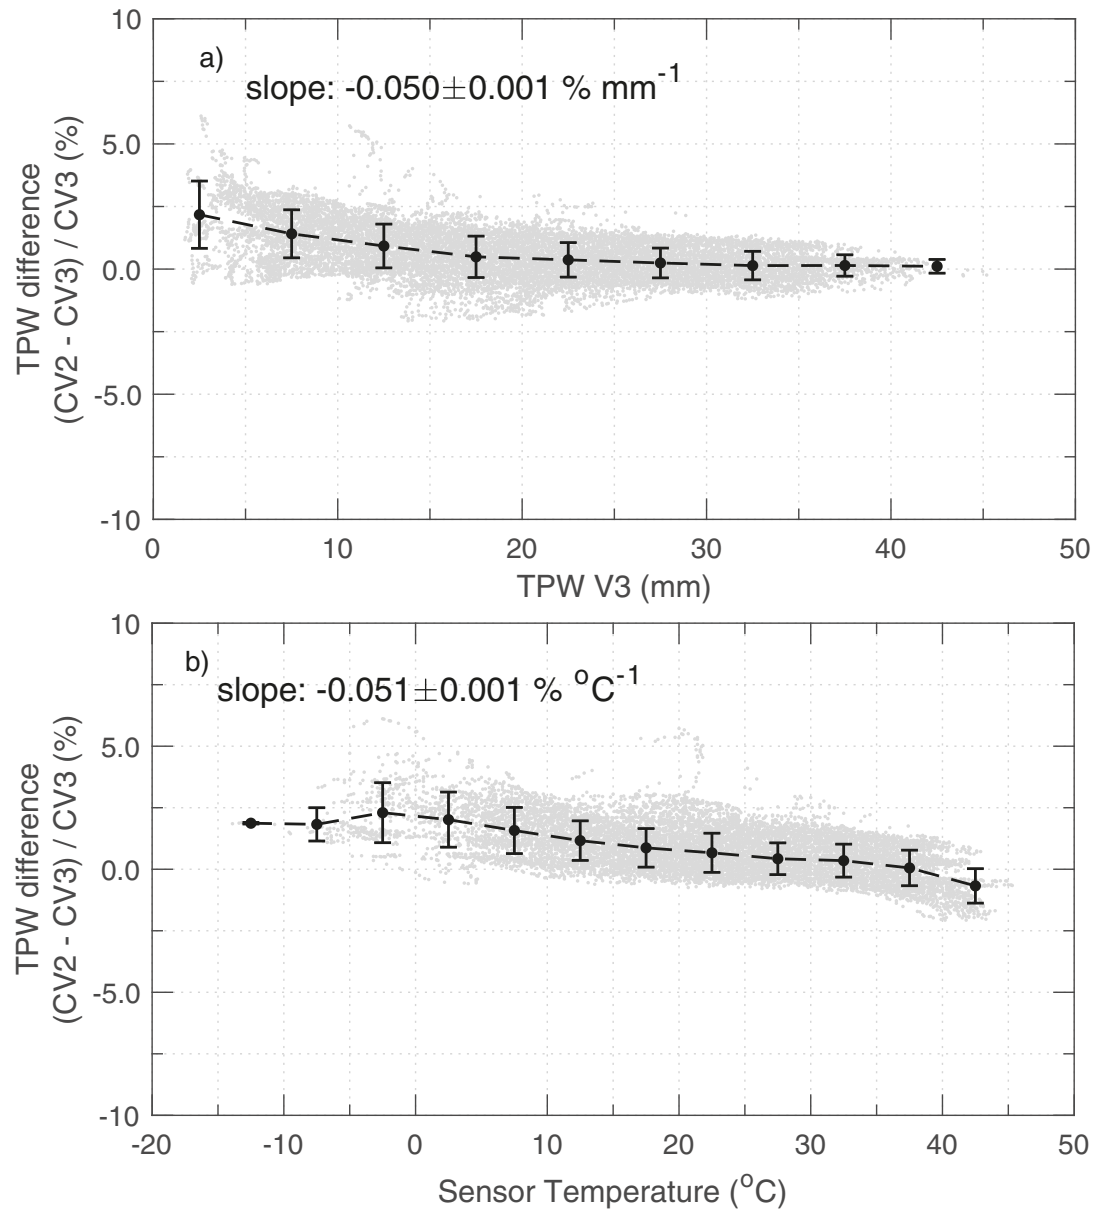

**Figure 10.** Dependence plot of the relative difference of the TPW from V2 and V3 AERONET algorithms from (a) the total amount of TPW and from (b) the temperature of the sensor. The black dots show the average difference in bins of 5 mm and  $5^{\circ}\text{C}$ , respectively, and the error-bar represents the standard deviation of the mean. The linear fit is based on all measurements.

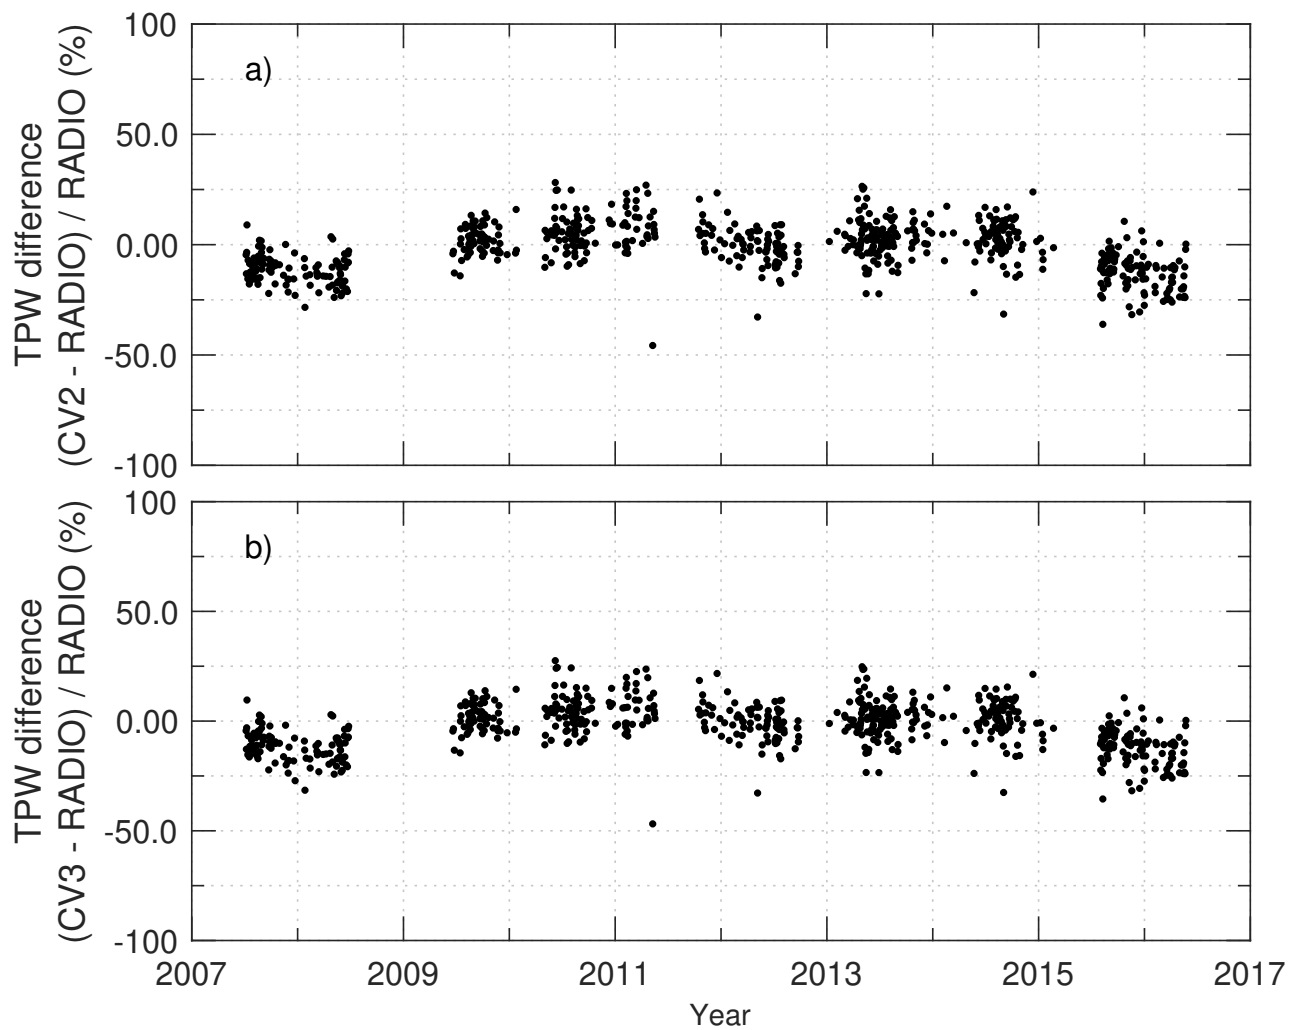

**Figure 11.** Time series of relative differences between (a) level 2.0 V2 TPW from Cimel sun-photometer and the radiosondes, and (b) from level 2.0 V3 TPW from Cimel, during the period 2007—2017.

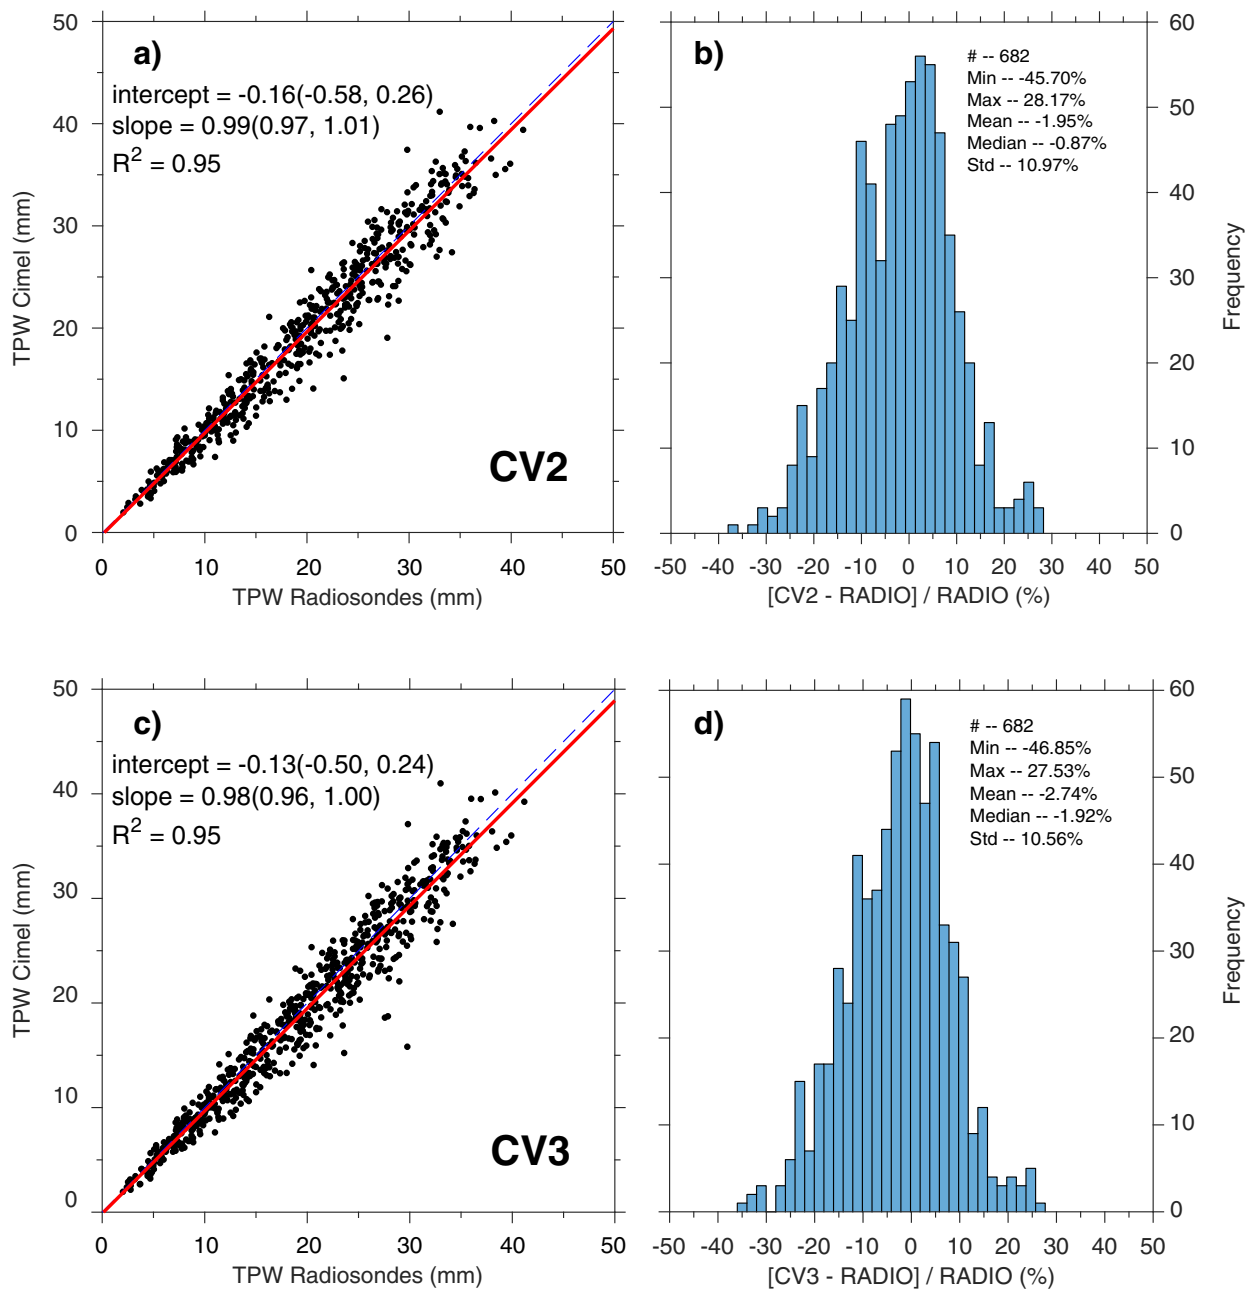

**Figure 12.** Scatter plot between the TPW from (a) the radiosondes-Cimet V2 and (c) Cimet V3. The red thick line shows the least square regression line and blue dashed line is the identity line. [The regression coefficients are displayed along with their 95% confidence interval \(in parenthesis\).](#) Frequency histogram of the relative difference between (b) the TPW from the radiosondes and CV2 and (d) CV3, respectively. ~~The red line shows the fit of a normal distribution to the data.~~

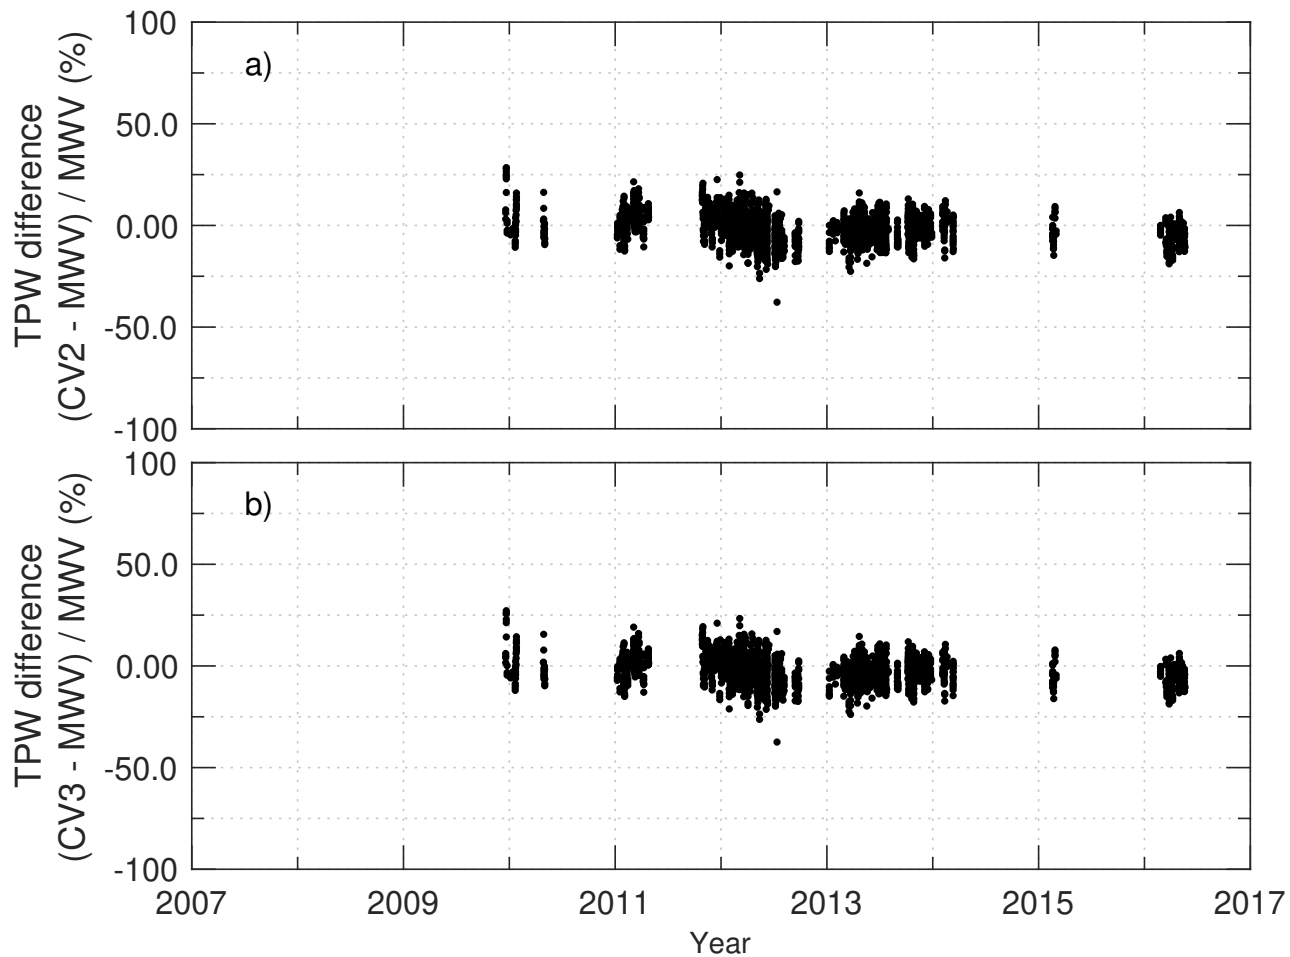

**Figure 13.** Time series of the relative differences between (a) level 2.0 V2 TPW from Cimel sun-photometer and the microwave radiometer, and from (b) level 2.0 V3 TPW from Cimel, during the period 2009–2017.

Scatter-plot between the TPW from (a) the microwave radiometer-Cimel V2 and (c) Cimel V3. The red thick line shows the least square regression line and blue dashed line is the identity line. Frequency histogram of the relative difference between (b) the TPW from the microwave radiometer and CV2 and (d) CV3, respectively. The red line shows the fit of a normal distribution to the

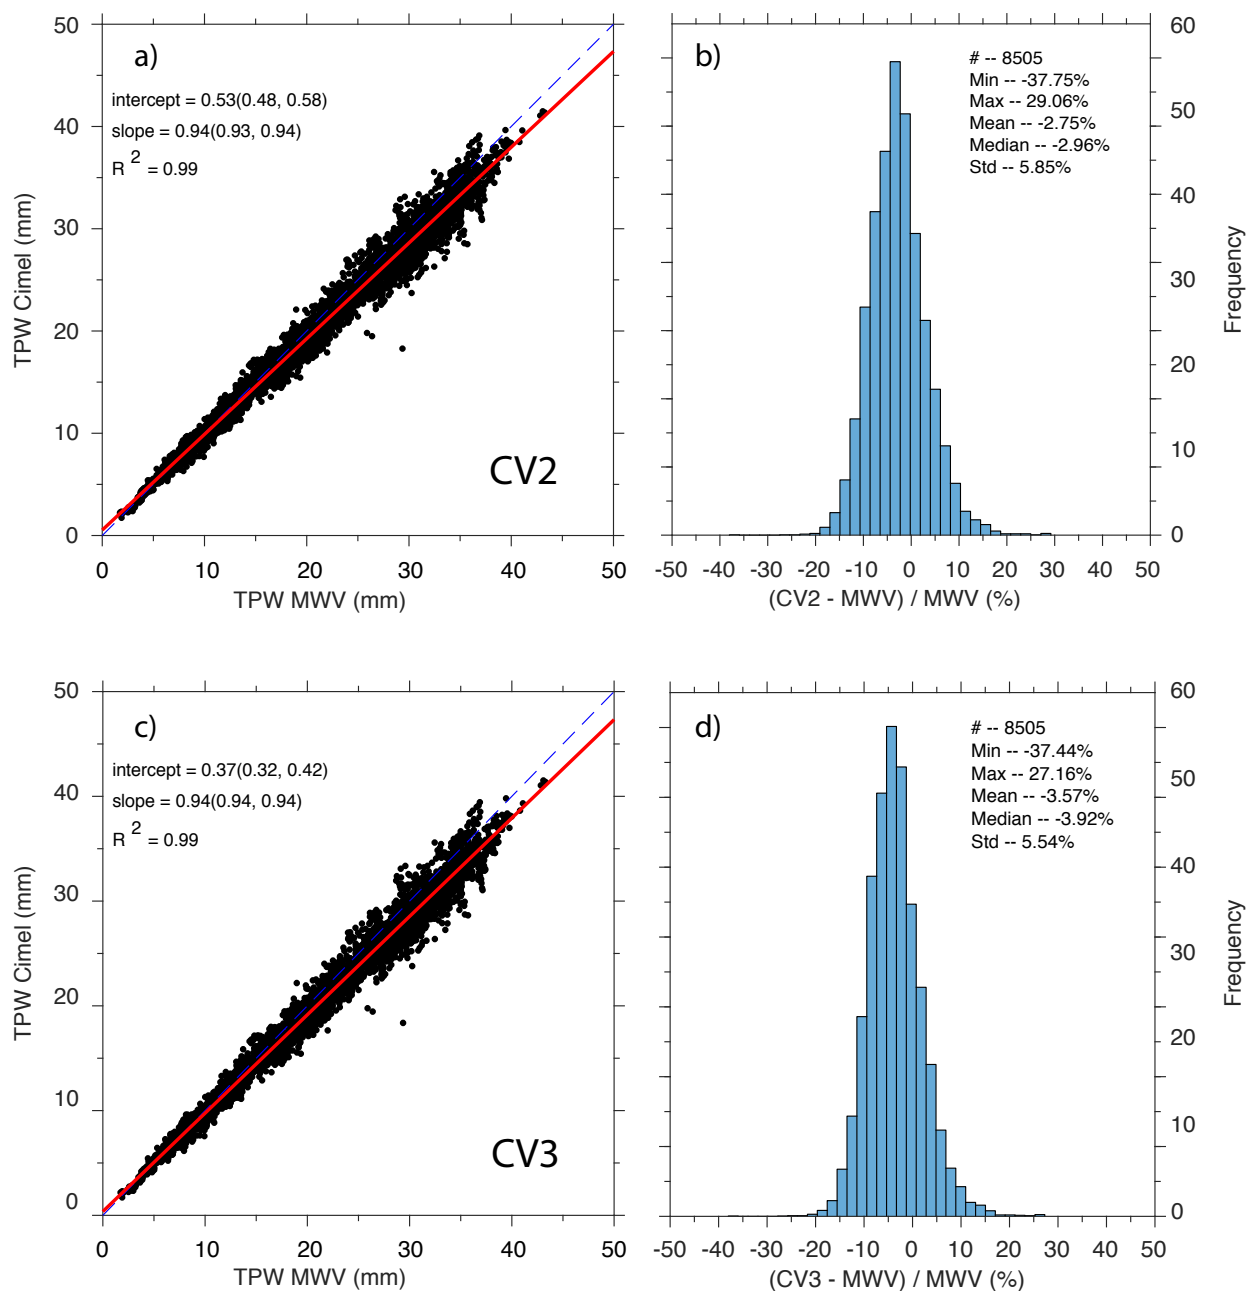

data.

**Figure 14.** Scatter plot between the TPW from (a) the microwave radiometer-Cimel V2 and (c) Cimel V3. The red thick line shows the least square regression line and blue dashed line is the identity line. The regression coefficients are displayed along with their 95% confidence interval (in parenthesis). Frequency histogram of the relative difference between (b) the TPW from the microwave radiometer and CV2 and (d) CV3, respectively.

Dependence plot of the relative difference of the TPW from Cimel and the radiometer from the SZA (a) for Cimel V2 and (b) Cimel V3. The Relative between (c) Cimel V2 and (d) Cimel V3 as a function of TPW and the internal sensor temperature for (e) V2 and (f) V3. The black dots show the average difference in bins of 5 degrees, 5 mm and 5°C and the error-bar represents the standard deviation of the

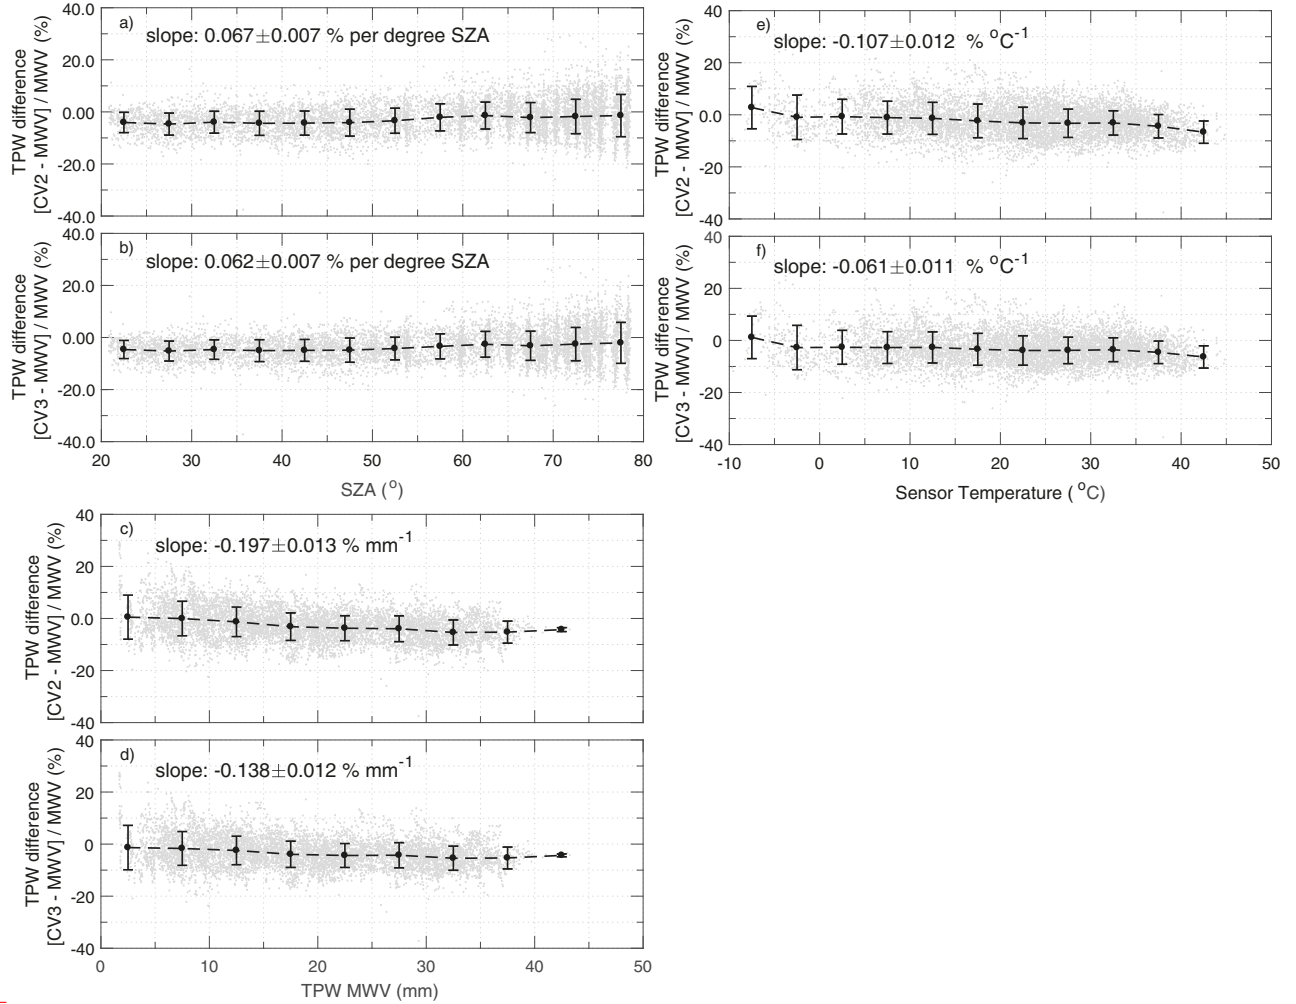

mean.

**Figure 15.** Dependence plot of the relative difference of the TPW from Cimel and the radiometer from the SZA (a) for Cimel V2 and (b) Cimel V3. The Relative between (c) Cimel V2 and (d) Cimel V3 as a function of TPW and the internal sensor temperature for (e) V2 and (f) V3. The black dots show the average difference in bins of 5 degrees, 5 mm and 5°C and the error-bar represents the standard deviation of the mean.

**Table 1.** Overview of the measurement characteristics and datasets used in this study for the period 2007—2017.

| Instrument  | Retrieval Method                                                                         | Total number<br>of observations | Total number of<br>daily mean values | Data frequency                      |
|-------------|------------------------------------------------------------------------------------------|---------------------------------|--------------------------------------|-------------------------------------|
| Radiosondes | Thin-film capacitance relative humidity<br>sensors use of balloons for vertical profiles | 7503                            | 3784                                 | 12 hrs                              |
| Radiometer  | Sky brightness temperature at 23.8GHz<br>water vapor absorption band.                    | 1859315                         | 1612                                 | 2 sec                               |
| Cimel V2    | Solar direct irradiance<br>at 940nm absorption band                                      | 33324                           | 1293                                 | ~20 min for<br>clear sky conditions |
| Cimel V3    | Solar direct irradiance<br>at 940nm absorption band                                      | 35373                           | 1325                                 | ~20 min for<br>clear sky conditions |



**Table 2.** Summary of ~~intercomparison statistics for the period July~~ daily mean statistics of all instruments and algorithms  
for the period July 2007 to December to December 2017.

|                         | Radiosondes        | <u>MWV</u> Radiometer | Cimel V2           | Cimel V3                                                                   |
|-------------------------|--------------------|-----------------------|--------------------|----------------------------------------------------------------------------|
| Average (mm)            | 18.75              | 17.47                 | 18.86              | 18.58                                                                      |
| Standard deviation (mm) | 8.78               | 8.50                  | 8.87               | 8.99                                                                       |
| Maximum (mm) /(date)    | 43.48/(07.08.2017) | 41.95/(07.08.2017)    | 41.27/(08.08.2010) | <del>44.13</del> <u>40.22</u> /( <del>16.07.2015</del> <u>08.08.2010</u> ) |
| Minimum (mm) /(date)    | 1.87/(01.02.2012)  | 2.04/(01.02.2012)     | 1.83/(01.02.2012)  | 1.83/(01.02.2012)                                                          |

**Table 3.** ~~Monthly-mean-Mean monthly~~ and median values of TPW and their IQR from the different instruments used in this study. ~~All units are in mm.~~

| Month     | Radiosondes |        |      |  | Radiometer |        |      |  | Cimel V2 |        |      |  | Cimel V3 |        |      |  |
|-----------|-------------|--------|------|--|------------|--------|------|--|----------|--------|------|--|----------|--------|------|--|
|           | mean        | median | IQR  |  | mean       | median | IQR  |  | mean     | median | IQR  |  | mean     | median | IQR  |  |
| January   | 9.69        | 9.12   | 5.65 |  | 10.40      | 10.39  | 5.83 |  | 7.27     | 6.62   | 4.99 |  | 7.66     | 6.98   | 5.53 |  |
| February  | 10.09       | 10.14  | 6.28 |  | 10.20      | 10.12  | 5.98 |  | 9.04     | 9.10   | 6.79 |  | 8.99     | 8.35   | 6.03 |  |
| March     | 11.42       | 11.04  | 5.94 |  | 11.49      | 10.87  | 5.71 |  | 10.05    | 9.40   | 5.37 |  | 9.81     | 9.17   | 5.00 |  |
| April     | 15.17       | 15.18  | 6.27 |  | 15.54      | 15.74  | 6.03 |  | 14.03    | 14.20  | 4.50 |  | 13.94    | 14.00  | 4.90 |  |
| May       | 20.92       | 20.69  | 7.63 |  | 21.73      | 21.98  | 7.43 |  | 19.69    | 19.41  | 7.33 |  | 19.36    | 19.16  | 6.43 |  |
| June      | 27.23       | 27.58  | 7.47 |  | 28.58      | 28.70  | 6.64 |  | 26.47    | 26.84  | 7.89 |  | 26.36    | 26.91  | 7.94 |  |
| July      | 29.64       | 29.67  | 8.11 |  | 29.78      | 30.45  | 6.88 |  | 27.82    | 27.91  | 8.32 |  | 28.28    | 28.20  | 8.05 |  |
| August    | 28.95       | 29.44  | 8.25 |  | 28.11      | 29.05  | 8.60 |  | 27.75    | 27.77  | 7.50 |  | 27.71    | 27.77  | 7.64 |  |
| September | 23.32       | 22.87  | 9.55 |  | 22.36      | 22.06  | 7.43 |  | 20.71    | 20.35  | 7.05 |  | 21.41    | 20.86  | 7.37 |  |
| October   | 18.30       | 18.38  | 9.59 |  | 18.79      | 17.86  | 8.24 |  | 15.41    | 14.47  | 9.06 |  | 15.28    | 14.49  | 8.25 |  |
| November  | 14.37       | 13.95  | 7.47 |  | 14.15      | 13.71  | 6.39 |  | 12.00    | 11.13  | 6.27 |  | 11.65    | 10.75  | 6.13 |  |
| December  | 10.62       | 9.83   | 6.41 |  | 10.65      | 10.06  | 5.54 |  | 9.23     | 9.00   | 5.88 |  | 9.49     | 9.14   | 6.04 |  |

**Table 4.** Same as Table 2, but just for the common measurements from all instruments

|                                | <u>Radiosondes</u>        | <u>MWV Radiometer</u>     | <u>Cimel V2</u>           | <u>Cimel V3</u>           |
|--------------------------------|---------------------------|---------------------------|---------------------------|---------------------------|
| <u>Average (mm)</u>            | <u>17.96</u>              | <u>18.57</u>              | <u>17.80</u>              | <u>17.65</u>              |
| <u>Standard deviation (mm)</u> | <u>8.95</u>               | <u>9.25</u>               | <u>8.72</u>               | <u>8.71</u>               |
| <u>Maximum (mm) /(date)</u>    | <u>39.90/(25.06.2013)</u> | <u>38.31/(08.07.2012)</u> | <u>36.35/(25.06.2013)</u> | <u>36.02/(25.06.2013)</u> |
| <u>Minimum (mm) /(date)</u>    | <u>2.02/(25.01.2010)</u>  | <u>1.784/(25.01.2010)</u> | <u>1.97/(25.01.2010)</u>  | <u>1.95/(25.01.2010)</u>  |

**Table 5.** Same as Table 3, but just for the common measurements. All units are in mm.

| Month     | Radiosondes |        |       |  | Radiometer |        |       |  | Cimel V2 |        |       |  | Cimel V3 |        |       |  |
|-----------|-------------|--------|-------|--|------------|--------|-------|--|----------|--------|-------|--|----------|--------|-------|--|
|           | mean        | median | IQR   |  | mean       | median | IQR   |  | mean     | median | IQR   |  | mean     | median | IQR   |  |
| January   | 6.41        | 4.95   | 6.13  |  | 6.67       | 4.87   | 6.20  |  | 6.53     | 4.76   | 6.38  |  | 6.44     | 4.67   | 6.31  |  |
| February  | 8.21        | 6.99   | 6.88  |  | 8.86       | 7.57   | 6.01  |  | 8.67     | 7.41   | 5.98  |  | 8.51     | 7.26   | 5.92  |  |
| March     | 9.17        | 8.06   | 3.95  |  | 9.43       | 8.78   | 3.32  |  | 9.21     | 8.93   | 3.25  |  | 9.08     | 8.73   | 3.18  |  |
| April     | 14.48       | 14.37  | 6.79  |  | 15.11      | 15.07  | 5.22  |  | 14.30    | 14.37  | 4.59  |  | 14.16    | 14.14  | 4.76  |  |
| May       | 19.14       | 18.46  | 7.75  |  | 19.09      | 19.06  | 7.69  |  | 18.42    | 18.25  | 7.33  |  | 18.27    | 18.25  | 8.49  |  |
| June      | 27.51       | 27.50  | 7.69  |  | 28.46      | 28.42  | 7.96  |  | 27.32    | 27.34  | 7.89  |  | 26.36    | 26.91  | 8.18  |  |
| July      | 28.21       | 28.61  | 6.81  |  | 29.49      | 30.18  | 8.12  |  | 27.93    | 29.21  | 8.18  |  | 27.12    | 27.02  | 6.30  |  |
| August    | 29.42       | 29.20  | 1.45  |  | 31.46      | 32.13  | 1.99  |  | 28.33    | 28.95  | 1.70  |  | 28.46    | 29.08  | 1.69  |  |
| September | 21.29       | 21.12  | 5.97  |  | 21.65      | 21.46  | 3.56  |  | 19.82    | 19.89  | 3.61  |  | 19.77    | 19.79  | 3.43  |  |
| October   | 14.55       | 15.47  | 6.83  |  | 15.30      | 17.08  | 6.48  |  | 15.34    | 16.87  | 6.50  |  | 15.10    | 16.61  | 6.46  |  |
| November  | 12.58       | 10.32  | 10.79 |  | 12.76      | 10.12  | 10.96 |  | 12.83    | 10.49  | 10.39 |  | 12.66    | 10.36  | 10.29 |  |
| December  | 9.16        | 8.56   | 6.46  |  | 9.51       | 8.50   | 6.82  |  | 9.54     | 9.11   | 6.60  |  | 9.38     | 8.90   | 6.55  |  |
